# Supplementary material for: Iron intake, haemoglobin and risk of gestational diabetes: a prospective cohort study
Source: PubMed Central journal article supplement — BMJ Open. 2012 Sep 25;2(5):e001730. doi: 10.1136/bmjopen-2012-001730 (PMC3467630; doi:10.1136/bmjopen-2012-001730), 2012-09-25
Supplement: bmjopen-2012-001730.draft_revisions.pdf [file bmjopen-2012-001730.draft_revisions.pdf]

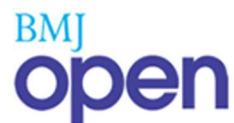

**Iron intake, haemoglobin and risk of gestational diabetes: a prospective cohort study**

|                                 |                                                                                                                                                                                                                                                                |
|---------------------------------|----------------------------------------------------------------------------------------------------------------------------------------------------------------------------------------------------------------------------------------------------------------|
| Journal:                        | <i>BMJ Open</i>                                                                                                                                                                                                                                                |
| Manuscript ID:                  | bmjopen-2012-001730                                                                                                                                                                                                                                            |
| Article Type:                   | Research                                                                                                                                                                                                                                                       |
| Date Submitted by the Author:   | 26-Jun-2012                                                                                                                                                                                                                                                    |
| Complete List of Authors:       | Helin, Annika; University of Tampere, School of Health Sciences<br>Kinnunen, Tarja; University of Tampere, School of Health Sciences<br>Raitanen, Jani; University of Tampere, School of Health Sciences<br>Luoto, Riitta; UKK Institute for Health Promotion, |
| <b>Primary Subject Heading</b>: | Reproductive medicine, obstetrics and gynaecology                                                                                                                                                                                                              |
| Secondary Subject Heading:      | Epidemiology                                                                                                                                                                                                                                                   |
| Keywords:                       | gestational diabetes , iron intake, iron supplementation, pregnancy, haemoglobin                                                                                                                                                                               |
|                                 |                                                                                                                                                                                                                                                                |

SCHOLARONE™  
Manuscripts

Peer Review Only

## Iron intake, haemoglobin and risk of gestational diabetes: a prospective cohort study

Annika Helin, MSc student<sup>1</sup>, Tarja I Kinnunen, university teacher<sup>1</sup>, Jani Raitanen, statistician<sup>1,2</sup>,  
Riitta Luoto, research director<sup>2,3</sup>

### Affiliations:

<sup>1</sup> University of Tampere, School of Health Sciences, FI-33014 University of Tampere, Finland;

<sup>2</sup> The UKK Institute for Health Promotion Research, P. O. Box 30, FI-33501 Tampere, Finland;

<sup>3</sup> The National Institute for Health and Welfare, The Unit of Sexual and Reproductive Health, P.O.  
Box 30, FI-00271, Helsinki, Finland

Correspondence to: Tarja Kinnunen [Tarja.I.Kinnunen@uta.fi](mailto:Tarja.I.Kinnunen@uta.fi)

The guarantor: Riitta Luoto

The Corresponding Author has the right to grant on behalf of all authors and does grant on behalf of all authors, an exclusive licence on a worldwide basis to the BMJ Publishing Group Ltd to permit this article (if accepted) to be published in BMJ editions and any other BMJ PGL products and sublicences such use and exploit all subsidiary rights, as set out in our licence.

**Keywords:** gestational diabetes, iron intake, iron supplementation, pregnancy, haemoglobin

Word count 3311

## Abstract

**Objective** To investigate the possible association between total daily iron intake from both food and supplements during pregnancy, haemoglobin in early pregnancy and the risk of gestational diabetes mellitus (GDM) in women at increased risk of GDM.

**Design** A prospective cohort study (based on a cluster-randomised controlled trial, where the intervention and the usual care groups were combined).

**Setting** Primary health care maternity clinics in 14 municipalities in south-western Finland.

**Participants** 399 pregnant women who were at increased risk of GDM participated in a GDM prevention trial and were followed throughout pregnancy.

**Main outcome measurements** The main outcome was GDM diagnosed with oral glucose tolerance test at 26-28 weeks' gestation or based on a diagnosis recorded in the Finnish Medical Birth registry. Data on iron intake was collected using a 181-item food frequency questionnaire and separate questions for supplement use at 26-28 weeks' gestation.

**Results** GDM was diagnosed in 72 women (18.1%) in the study population. The odds ratio (OR) for total iron intake as a continuous variable was 1.005 (95% confidence interval 1.000 to 1.011;  $P=0.041$ ) after adjustment for BMI, age, diabetes in first- or second-degree relatives and GDM or macrosomia in earlier pregnancy. Women in the highest fifth of total daily iron intake had an OR of 1.55 (95% confidence interval 0.81 to 2.96;  $P=0.19$ ) for GDM. After excluding participants with low haemoglobin levels ( $\leq 120$  g/l) already in early pregnancy the OR was 2.21 (95% confidence interval 1.11 to 4.41;  $P=0.025$ ).

**Conclusions** Our results suggest that high iron intake during pregnancy increases the risk of GDM especially in women who are not anaemic in the beginning of the pregnancy and who are at increased risk of GDM. These findings suggest that routine iron supplementation should be reconsidered in this risk group of women.

**Trial registration: Current Controlled Trials ISRCTN33885819**

## INTRODUCTION

Gestational diabetes mellitus (GDM) is a disturbance in glucose metabolism, which is diagnosed during pregnancy and affects 1-14% of pregnancies in different populations<sup>1</sup>. The incidence of gestational diabetes has been increasing the last 20 years<sup>2</sup>. Risk factors for GDM include higher maternal body mass index (BMI), higher age and family history of diabetes<sup>3</sup>. Approximately half of the GDM cases can be explained by overweight<sup>4</sup>. GDM causes short and long term risks to both the mother and the child. The most common result of GDM is newborn macrosomia, which increases several adverse outcomes during delivery such as shoulder dystocia, perineal lacerations, blood loss and increased caesarean birth<sup>5</sup>. GDM also increases the risk of glucose metabolism disorders and type 2 diabetes in later life of the mother and the newborn<sup>6,7</sup>.

High iron load and disorders of iron metabolism have been associated with an increased risk of disturbances in glucose metabolism<sup>8-10</sup>. In hereditary hemochromatosis iron accumulation in the body leads to diabetes in 30-60% of patients<sup>11</sup>. Also in animal models iron has been shown to induce diabetes<sup>12</sup>. Iron binding medication is effective in preventing diabetes in iron overload conditions<sup>13</sup>. Frequent blood donation has been shown to result in improvement in glucose metabolism even in healthy people<sup>14</sup>. Higher iron stores have been found in gestational diabetes patients measured most commonly by serum ferritin<sup>15-17</sup>. High haemoglobin level in early pregnancy has been reported to be an independent risk factor for GDM<sup>18</sup> and lower haemoglobin levels and anaemia during pregnancy have been shown to result in lower risk of GDM<sup>19</sup>. A large proportion of women, up to 78% in Finland<sup>20</sup>, use supplemental iron during pregnancy even with good haemoglobin levels and thus it is an important matter to investigate the possible adverse effects of iron. High iron intake could be especially risky for women with already good iron stores.

1  
2  
3 Studies of total iron intake and the risk of GDM are scarce: only Bowers et al.<sup>21</sup> have investigated  
4 pre-pregnancy total iron intake in relation to the risk of GDM. Other studies have investigated iron  
5 intake either from food or supplements only and have thus failed to report the effect of total iron  
6 intake<sup>22 23</sup>. Only one placebo controlled clinical trial has been conducted on supplemental iron and  
7 the risk of GDM<sup>24</sup>. To our knowledge there are no published studies of total iron intake during  
8 pregnancy, haemoglobin and the risk of GDM. The objective of this study was to investigate the  
9 possible association between total daily iron intake from both food and supplements during  
10 pregnancy, haemoglobin levels in early pregnancy and the risk of gestational diabetes in women at  
11 increased risk of GDM.  
12  
13  
14  
15  
16  
17  
18  
19  
20  
21  
22  
23  
24

## 25 MATERIAL AND METHDOS

26  
27  
28  
29 The data of this study was originally collected as a part of a larger gestational diabetes prevention  
30 trial, which is described in more detail elsewhere<sup>25</sup>. The effects of the intervention on GDM and  
31 newborns birthweight have been reported elsewhere<sup>26</sup>. This cluster-randomised trial was carried out  
32 in 14 municipalities in Pirkanmaa region in south-western Finland in 2007-2009. The municipalities  
33 were randomised in pairs into intervention and usual care municipalities.  
34  
35  
36  
37  
38  
39  
40  
41  
42

43 The inclusion criteria for the trial was to have at least one of the following risk factors: BMI  $\geq 25$   
44 kg/m<sup>2</sup>; age  $\geq 40$  years; GDM, glucose intolerance or newborn's macrosomia ( $\geq 4500$ g) in any earlier  
45 pregnancy or type 1 or 2 diabetes in first- or second-degree relatives. Women were excluded from  
46 the trial if they had an abnormal measurement in the baseline (8-12 weeks' gestation) glucose  
47 tolerance test (fasting blood glucose  $\geq 5.3$  mmol/l,  $>10.0$  mmol/l at 1 h or  $>8.6$  mmol/l at 2 h); pre-  
48 pregnancy diabetes (type 1 or 2); age  $<18$  years; no Finnish language skills; multiple pregnancy;  
49 restrictions from physical activity; substance abuse or psychiatric illness. The trial was approved by  
50  
51  
52  
53  
54  
55  
56  
57  
58  
59  
60

1  
2  
3 the ethical committee of Pirkanmaa Hospital District and written informed consent was provided by  
4  
5 the participants.  
6  
7

8  
9  
10 A total of 2271 women were screened for the study and of them 726 were preliminary eligible to  
11 participate in the study<sup>26</sup>. Of these women 640 (88.2%) gave an informed consent to participate in  
12 the trial. At the baseline (8-12 weeks' gestation) oral glucose tolerance test 174 women had an  
13 abnormal result and were thus excluded. Furthermore 38 women had a miscarriage and 29 were lost  
14 to follow-up. Finally, 399 participants were included in the analyses (219 in the intervention group  
15 and 180 in the usual care group).  
16  
17  
18  
19  
20  
21  
22  
23

24  
25 The intervention group participated in individual counselling on weight gain, physical activity and  
26 diet on five antenatal visits in primary health care maternity clinics. The objectives of the  
27 counselling were to guide the participants in monitoring their weight gain, increasing or  
28 maintaining their leisure time physical activity and achieving a healthy diet fulfilling the national  
29 recommendations. The effects of intensified dietary counselling on food habits and the intake of  
30 energy, energy-yielding nutrients, fiber, selected fatty acids and cholesterol have been reported  
31 elsewhere<sup>27</sup>. The counselling was not aiming to influence iron intake. In this study the  
32 intervention and usual care groups were combined and these groups had no differences in the  
33 incidence of GDM or in iron intake.  
34  
35  
36  
37  
38  
39  
40  
41  
42  
43  
44  
45  
46

47  
48 Background information of the participants was gathered with a baseline questionnaire at the first  
49 prenatal visit (8-12 weeks' gestation). Information of pre-pregnancy BMI (weight self reported and  
50 height measured at 8-12 weeks' visit) and haemoglobin were abstracted from maternity cards. In  
51 this study we used information of haemoglobin measurements from early pregnancy (weeks 8-12,  
52 or 16-18 for those with missing values for 8-12 weeks) to determine the status of body iron stores in  
53  
54  
55  
56  
57  
58  
59  
60

1  
2  
3 the beginning of pregnancy and before the physiological decrease in haemoglobin levels. The  
4  
5 participants were considered to have good haemoglobin levels if they had a haemoglobin  
6  
7 measurement of over 120 g/l according to the lower limit for normal haemoglobin in non-pregnant  
8  
9 women<sup>28</sup>. The limit for normal haemoglobin in pregnant women (110 g/l) was not used because of  
10  
11 low frequency of cases with haemoglobin level under 110 g/l in early pregnancy (n=7). All women  
12  
13 underwent a 75 g oral glucose tolerance test at 26-28 weeks' gestation. The criterion for gestational  
14  
15 diabetes diagnosis was to have at least one abnormal value: fasting glucose after an overnight fast  
16  
17  $\geq 5.3$  mmol/l, blood glucose  $> 10.0$  mmol/l one hour after or  $> 8.6$  mmol/l two hours after consuming  
18  
19 75 g of glucose. To cover all possible cases information of gestational diabetes was abstracted from  
20  
21 the Finnish Medical Birth Register.  
22  
23  
24  
25

26  
27 Information of diet and supplement use was obtained by a validated 181-item food frequency  
28  
29 questionnaire<sup>29</sup>. The participants completed the questionnaire at 8-12 weeks' gestation and again at  
30  
31 26-28 and 36-37 weeks' gestation. In the 8-12 weeks' questionnaire the participants were asked  
32  
33 about their dietary habits during one month before beginning of the pregnancy and in 26-28 and 36-  
34  
35 37 weeks' questionnaires the participants were asked about their dietary habits during the previous  
36  
37 month. The completed questionnaires were checked by a nutritionist and those with more than ten  
38  
39 missing values in the frequency data were completed after consulting the participant on the phone.  
40  
41 In the food frequency questionnaire the dietary habits were assessed by detailed questions of  
42  
43 frequency of use (per day, week, month or not at all) and the portion sizes of specific food items.  
44  
45 The participants were also asked to report their supplement use: brand name of the supplement,  
46  
47 dosage and frequency of use (per day, week or month). The gathered data was then entered into a  
48  
49 food database using a software program of the National Institute for Health and Welfare, Helsinki,  
50  
51 Finland, and coded to daily food record form. Nutrient intakes were calculated by using the 10<sup>th</sup>  
52  
53 release (updated in 2009) of the Finnish Food Composition Database Fineli ([www.fineli.fi](http://www.fineli.fi)) and in-  
54  
55  
56  
57  
58  
59  
60

1  
2  
3 house software of the National Institute for Health and Welfare, Helsinki. In this study information  
4  
5 of dietary habits and supplement use at 26-28 weeks of gestation was used to get the best estimation  
6  
7 of iron intake during pregnancy and before the onset of GDM.  
8  
9

### 10 11 **Statistical methods**

12  
13 The study population was categorised into five equal groups according to their total daily iron  
14  
15 intake. To better see the differences between women in the highest fifth of total iron intake and the  
16  
17 other women, we combined the three groups in the middle (20, 60 and 20 percent). The groups were  
18  
19 tested for possible differences in risk factors and other background characteristics using Chi-square  
20  
21 test, Kruskal-Wallis test or One-way ANOVA. The incidence of GDM was then investigated  
22  
23 between the iron intake groups and the differences were tested statistically using Chi-square test or  
24  
25 Fisher exact test. Haemoglobin was considered as a potential effect modifier. Women were divided  
26  
27 into two groups according to their haemoglobin level in early pregnancy:  $>120$  g/l or  $\leq 120$  g/l.  
28  
29  
30  
31  
32

33  
34 Logistic regression was used to assess the odds ratio (OR) for gestational diabetes. The dependent  
35  
36 variable in the regression model was GDM (yes/no). In the first model iron intake was assessed as a  
37  
38 continuous variable. In the second model the highest fifth of total iron intake (intake  $\geq 110$  mg) was  
39  
40 compared to the rest of the study population (iron intake under 110 mg). The models were adjusted  
41  
42 for BMI, age (both as continuous), diabetes in first- or second-degree relatives and GDM or  
43  
44 macrosomia in earlier pregnancy (both as categorical). Both models were executed separately for all  
45  
46 women and for women with haemoglobin levels over 120 g/l in early pregnancy (8-12 or 16-18  
47  
48 weeks' gestation).  
49  
50  
51

52  
53  
54 We also added interaction terms for iron intake and haemoglobin and for iron intake and BMI to the  
55  
56 model but they were not statistically significant and therefore are not presented here. In sensitivity  
57  
58  
59  
60



1  
2  
3 analyses, we examined the association between the total iron intake and the risk of GDM using  
4  
5 alternative cut-off points for categorising participants based on their iron intake (15, 70 and 15  
6  
7 percent; 25, 50 and 25 percent and 30, 40 and 30 percent) and the same statistical tests as described  
8  
9 above. All analyses were performed with SPSS statistics (version 19).  
10

## 11 12 13 14 **RESULTS**

15  
16  
17  
18 Based on the questionnaire completed at 26-28 weeks' gestation, the mean daily iron intake from  
19  
20 food was 14.4 mg (SD 4.3; median 13.9 mg) among the study population. In the study group 65.7%  
21  
22 of women used supplemental iron and the median of supplemental intake was 27.0 mg. The most  
23  
24 used dosages for iron supplementation were 10.0 mg, 20.0 mg and 100.0 mg of elemental iron  
25  
26 ( $\text{Fe}^{2+}$ ). The median for total iron intake was 27.1 mg (interquartile range 15.5-89.3 mg) (Figure 1).  
27  
28 Iron intake from food was similar in nonusers and users of supplemental iron: users of supplemental  
29  
30 iron had a mean daily intake of 14.5 mg (SD 4.5) and nonusers 14.3 mg (SD 3.9). The mean  
31  
32 haemoglobin level of the study population in the beginning of pregnancy was 134 g/l (SD 11; min  
33  
34 107 g/l; max 169 g/l).  
35  
36  
37  
38  
39

40  
41 The oral glucose tolerance test at 26-28 weeks' gestation was abnormal in 14.0% of the study  
42  
43 population (n=56, missing value for three women). Furthermore 16 women received a gestational  
44  
45 diabetes diagnosis during their pregnancy. Figure 2 shows the incidence of GDM in fifths of total  
46  
47 iron intake. There was a tendency for a higher incidence of GDM in the highest fifth of total iron  
48  
49 intake.  
50

51  
52  
53  
54 Between the iron intake groups (20%, 60% and 20%) there were no significant differences in terms  
55  
56 of proportion of primigravida, age, diabetes in first- or second-degree relatives or GDM or  
57  
58  
59  
60

1  
2  
3 macrosomia in earlier pregnancy (Table 1). Women in the highest iron intake group had a slightly  
4  
5 lower mean BMI as compared to other women (P=0.05). Haemoglobin levels in early pregnancy  
6  
7 differed between the groups as expected (P<0.001). Table 2 shows the incidence of GDM in the  
8  
9 three iron intake groups. The incidence was higher in the highest iron intake group (20.8%)  
10  
11 compared to the other two groups (16.7% in both) but the difference was not statistically significant  
12  
13 (P=0.70). After excluding those who had low haemoglobin levels ( $\leq 120$  g/l) already in early  
14  
15 pregnancy, the difference between the groups was even larger but still not statistically significant  
16  
17 (P=0.11).  
18  
19

20  
21  
22  
23 The logistic regression model shows that after adjustment for risk factors and background  
24  
25 characteristics total iron intake was significantly and positively associated with gestational diabetes  
26  
27 mellitus (Table 3). When iron intake was used as a continuous variable the OR was 1.005 (P=0.041)  
28  
29 for all women and 1.008 (P=0.005) for those with haemoglobin levels over 120 g/l. In the second  
30  
31 model the OR for GDM was 1.55 (95% confidence interval 0.81 to 2.96, P=0.19) for the highest  
32  
33 fifth of iron intake among all women. After excluding women with low haemoglobin levels ( $\leq 120$   
34  
35 g/l) in early pregnancy the OR was 2.21 (95% confidence interval 1.11 to 4.41, P=0.025).  
36  
37  
38  
39

40  
41 In sensitivity analyses the odds ratios were higher when 15% of women with the highest iron intake  
42  
43 were compared to the rest 85% of women. The odds ratios were lower when 25% or 30% of women  
44  
45 with highest intake were compared to the rest 75% and 70% of women respectively (results not  
46  
47 shown).  
48  
49

## 50 51 52 **DISCUSSION** 53 54 55 56 57 58 59 60

1  
2  
3 In this study we investigated the possible association between total daily iron intake during  
4 pregnancy, haemoglobin in early pregnancy and the risk of gestational diabetes. To our knowledge  
5 there are no similar studies published previously. We discovered that there was a tendency for a  
6 higher incidence of GDM in the highest fifth of total iron intake. High iron intake increased the risk  
7 of GDM especially for those women who had good haemoglobin levels in early pregnancy: we  
8 discovered a two-fold OR for GDM for women in the highest fifth of iron intake with a  
9 haemoglobin level of over 120 g/l in early pregnancy.  
10  
11  
12  
13  
14  
15  
16  
17  
18  
19

20 Our study has several strengths. Firstly unlike most of the previous studies we had detailed  
21 information of iron intake from both food and supplements. Secondly we had information of  
22 baseline OGTT and could therefore exclude women with undiagnosed prepregnancy diabetes.  
23 Additionally Finnish Medical Birth Registry could be utilized to cover those GDM cases that were  
24 undiagnosed in the 26-28 weeks' OGTT. We also had information of haemoglobin measurements  
25 of the study population during pregnancy although measured by nurses. All of our data was  
26 collected prospectively. The participation rate in the original trial was high (88% in both the  
27 intervention and the usual care groups) improving the generalisability of the results to other women  
28 with risk factors for GDM.  
29  
30  
31  
32  
33  
34  
35  
36  
37  
38  
39  
40  
41  
42

43 A limitation of this kind of study is that estimating iron intake during pregnancy can be challenging  
44 because dietary habits and use of supplements can vary a lot during pregnancy due to nausea and  
45 other changes in well being. Iron intake was assessed at a certain point in time, thus it does not  
46 cover the intake during the whole pregnancy. In our study we decided to use information of iron  
47 intake in mid-pregnancy to get the best estimation on iron intake during pregnancy and before the  
48 onset of GDM. We did not use information of iron intake abstracted in the beginning of pregnancy  
49 because it covered only dietary habits and supplement use during one month before the pregnancy  
50  
51  
52  
53  
54  
55  
56  
57  
58  
59  
60

1  
2  
3 when use of supplemental iron is rare. However our information of iron intake covers only one  
4  
5 month in the mid-pregnancy. Additionally we could not assess iron absorption, for example with  
6  
7 blood measurements, which also can vary a lot depending on body iron status and the contents of  
8  
9 meals.  
10

11  
12  
13  
14 There are also limitations concerning the haemoglobin measurements used in our study. In the  
15  
16 maternity clinics haemoglobin levels are usually screened with a capillary haemoglobin  
17  
18 measurement using finger-stick samples. This method has been demonstrated to be reliable in  
19  
20 determining haemoglobin values but it is however susceptible to handling errors<sup>30</sup> and therefore  
21  
22 there can be variation in the test results. Additionally we had a lot of missing values in haemoglobin  
23  
24 measurements and thus we decided to use the haemoglobin measurement at 16-18 weeks' gestation  
25  
26 for those with missing values at weeks 8-12 (n= 28). Although measurements at weeks 16-18 do not  
27  
28 present the haemoglobin levels at early pregnancy our objective was to analyse separately women  
29  
30 who were not anaemic and thus including women who had a haemoglobin level of over 120 g/l still  
31  
32 at weeks 16-18 would help us not to underestimate the proportion of women who were not anaemic  
33  
34 in the beginning of the pregnancy. However for these reasons our results in respect of haemoglobin  
35  
36 measurements should be considered with caution and further studies with reliable and  
37  
38 comprehensive haemoglobin measurements are warranted to confirm our results.  
39  
40  
41  
42  
43  
44

45 In a somewhat similar study Bo et al.<sup>22</sup> discovered that women who used supplemental iron during  
46  
47 mid-pregnancy had a 2- to 3-fold risk of GDM. They however had no information of dietary intake  
48  
49 of iron or haemoglobin levels or other measurements of iron stores. Their findings are however in  
50  
51 line with our results which suggest that dietary intake could play a relatively small part in the  
52  
53 association whereas high supplemental iron intake could be responsible for most of the increase in  
54  
55 GDM risk. Somewhat different results have been reported recently by Bowers et al.<sup>21</sup> and Qiu et  
56  
57  
58  
59  
60

1  
2  
3 al.<sup>23</sup>. Bowers et al.<sup>21</sup> investigated dietary and supplemental iron intake during one year before  
4 pregnancy utilising the material from the Nurses Health study. They observed no significant effect  
5 of total, nonheme or supplemental iron intake on the risk of GDM. It can be argued though, that  
6 usually iron supplementation outside of pregnancy is more rare and concerns mainly those who are  
7 anaemic. However they did find a significant and positive association between heme iron intake and  
8 GDM. Similarly Qiu et al.<sup>23</sup> demonstrated an association between heme iron intake during the time  
9 before conception and in early pregnancy and the risk of GDM. To our knowledge only one placebo  
10 controlled clinical trial has been conducted to investigate the association between iron  
11 supplementation and GDM<sup>24</sup>. This study did not observe any association. However it can be argued  
12 that the intake of supplemental iron was quite low in this study because of only about 50%  
13 compliance to a daily supplement of 60 mg of elemental iron.  
14  
15  
16  
17  
18  
19  
20  
21  
22  
23  
24  
25  
26  
27  
28

29 Iron is a highly reactive component with a possibility to participate in harmful reactions<sup>31</sup>. The  
30 human body can excrete iron with very limited mechanisms and thus iron intake is highly regulated  
31 according to body iron needs<sup>32</sup>. Iron could interfere with glucose metabolism in several ways. For  
32 example following mechanisms have been proposed: Iron decreases insulin extraction and  
33 metabolism in the liver, which leads to peripheral hyperinsulinemia<sup>33</sup>. Iron overload results in  
34 oxidative stress in pancreatic  $\beta$ -cells, which leads to destruction of the pancreatic islets and thus  
35 decreases insulin secretion<sup>34</sup>. The exact mechanisms, which link iron to diabetes are still unsolved.  
36 However the association can be argued to be biologically plausible.  
37  
38  
39  
40  
41  
42  
43  
44  
45  
46  
47  
48

49 Accumulating body of evidence supports the hypothesis of excess iron as a risk factor for glucose  
50 metabolism disorders such as gestational diabetes. Iron deficiency anaemia has been shown to  
51 reduce the incidence of GDM<sup>19</sup>. Respectively high haemoglobin level (>130 g/l) in early pregnancy  
52 has been demonstrated to be an independent risk factor for GDM<sup>18</sup>. It seems that iron can affect  
53  
54  
55  
56  
57  
58  
59  
60

1  
2  
3 glucose metabolism even with no overt iron overload. Women diagnosed with GDM have been  
4  
5 observed to have increased iron stores compared to women without GDM<sup>15 17</sup>. However many of  
6  
7 these studies have been cross-sectional and it has been criticised that higher serum ferritin levels  
8  
9 could in fact reflect inflammation in the body and could be rather a result than a cause for  
10  
11 diabetes<sup>16</sup>.  
12

13  
14  
15  
16 In summary it seems that high iron intake might be a factor, which increases the risk of GDM  
17  
18 especially in women with already good iron stores. Use of iron supplements during pregnancy is  
19  
20 common even in women with good haemoglobin levels. Our results suggest that routine use of iron  
21  
22 supplements should be reconsidered in non-anaemic women with risk factors for GDM. To confirm  
23  
24 the hypothesis there is need for a large prospective study – ideally a randomised controlled trial –  
25  
26 with reliable and comprehensive information on iron intake from food and supplements during  
27  
28 pregnancy accompanied with serum measurements to determine the level of body iron stores.  
29  
30  
31

### 32 33 34 **Author contributions**

35  
36 AH, TIK and RL designed and conducted research; AH and JR performed statistical analyses; AH  
37  
38 drafted the paper and revised it based on the comments from the other authors. TIK and RL have  
39  
40 the primary responsibility for final content. All authors read, commented and approved the final  
41  
42 manuscript.  
43  
44  
45

### 46 47 **Acknowledgements**

48  
49 Suvi M Virtanen and Suvi Ahonen are acknowledged for their contribution for the FFQ method and  
50  
51 for dietary calculations. Jatta Puhkala is acknowledged for checking and coding the dietary data.  
52  
53 We also sincerely thank all the nurses of the participating maternity clinics for their invaluable work  
54  
55 in implementing the study protocol and the pregnant women who participated in the study.  
56  
57  
58  
59  
60

### **A competing interest declaration**

All authors have completed the Unified Competing Interest form at [www.icmje.org/coi\\_disclosure.pdf](http://www.icmje.org/coi_disclosure.pdf) (available on request from the corresponding author) and declare that they have no financial or non-financial interests that may be relevant to the submitted work.

### **Funding**

(Finnish) Diabetes Research Fund, Competitive Research Funding of the Tampere University Hospital, Academy of Finland, Ministry of Education, and Ministry of Social Affairs and Health.

The views expressed in this paper are those of the authors and not necessarily those of the funders

### **What is already known on this subject**

- High iron stores and high iron intake have been associated with the risk of GDM in several studies.
- Anaemia is known to result in lower incidence of GDM.
- There are no previous studies available in which total daily iron intake during pregnancy and haemoglobin levels have been studied in relation to GDM risk.

### **What this study adds**

- Our results suggest that high iron intake during pregnancy increases the risk of GDM especially in women who are not anaemic in the beginning of the pregnancy and who are at increased risk of GDM.
- Our findings suggest that routine iron supplementation should be reconsidered in this risk group of women.

## References

- 1 American Diabetes Association. Diagnosis and classification of diabetes mellitus. *Diabetes Care* 2012;35(Suppl 1):S64-71.
- 2 Ferrara A. Increasing prevalence of gestational diabetes mellitus: a public health perspective. *Diabetes Care* 2007;30(Suppl 2):S141-6.
- 3 King H. Epidemiology of glucose intolerance and gestational diabetes in women of childbearing age. *Diabetes Care* 1998;21(Suppl. 2):B9–B13.
- 4 Kim SY, England L, Wilson HG, Bish C, Satten GA, Dietz P. Percentage of gestational diabetes mellitus attributable to overweight and obesity. *Am J Public Health* 2010;100:1047-52.
- 5 Stotland NE, Caughey AB, Breed EM, Escobar GJ. Risk factors and obstetric complications associated with macrosomia. *Int J Gynaecol Obstet* 2004;87:220-6.
- 6 Lee AJ, Hiscock RJ, Wein P, Walker SP, Permezel M. Gestational diabetes mellitus: clinical predictors and long-term risk of developing type 2 diabetes: a retrospective cohort study using survival analysis. *Diabetes Care* 2007;30:878-883.
- 7 Clausen TD, Mathiesen ER, Hansen T, Pedersen O, Jensen DM, Lauenborg J, Schmidt L, Damm P. Overweight and the metabolic syndrome in adult offspring of women with diet-treated gestational diabetes mellitus or type 1 diabetes. *J Clin Endocrinol Metab* 2009;94:2464-2470.
- 8 Tuomainen TP, Nyysönen K, Salonen R, Tervahauta A, Korpela H, Lakka T, Kaplan GA, Salonen JT. Body iron stores are associated with serum insulin and blood glucose concentrations. Population study in 1,013 eastern Finnish men. *Diabetes Care* 1997;20:426-8.
- 9 Ford ES, Cogswell ME. Diabetes and serum ferritin concentration among U.S. adults. *Diabetes Care* 1999;22:1978-83.



- 1  
2  
3  
4  
5  
6  
7  
8  
9  
10  
11  
12  
13  
14  
15  
16  
17  
18  
19  
20  
21  
22  
23  
24  
25  
26  
27  
28  
29  
30  
31  
32  
33  
34  
35  
36  
37  
38  
39  
40  
41  
42  
43  
44  
45  
46  
47  
48  
49  
50  
51  
52  
53  
54  
55  
56  
57  
58  
59  
60
- 10 Jiang R, Manson JE, Meigs JB, Ma J, Rifai N, Hu FB. Body iron stores in relation to risk of type 2 diabetes in apparently healthy women. *JAMA* 2004;291:711-7.
- 11 Powell LW, Yapp TR. Hemochromatosis. *Clinics in Liver Disease* 2000;4:211-28.
- 12 Awai M, Narasaki M, Yamanoi Y, Seno S. Induction of diabetes in animals by parenteral administration of ferric nitrilotriacetate. *Am J Pathol* 1979;95:663-73.
- 13 Brittenham GM, Griffith PM, Nienhuis AW, McLaren CE, Young NS, Tucker EE, Allen CJ, Farrell DE, Harris John W. Efficacy of deferoxamine in preventing complications of iron overload in patients with thalassemia major. *N Engl J Med* 1994;331:567-573.
- 14 Fernandez-Real JM, Lopez-Bermejo A, Ricart W. Iron stores, blood donation, and insulin sensitivity and secretion. *Clin Chem* 2005;51:1201-5.
- 15 Lao TT, Chan PL, Tam KF. Gestational diabetes mellitus in the last trimester – a feature of maternal iron excess?. *Diabet Med* 2001;18:218-23.
- 16 Chen X, Scholl TO, Stein TP. Association of elevated serum ferritin levels and the risk of gestational diabetes mellitus in pregnant women: The Camden study. *Diabetes Care* 2006;29:1077-82.
- 17 Afkhami-Ardekani M, Rashidi M. Iron status in women with and without gestational diabetes mellitus. *J Diabetes Complications* 2009;23:194-8.
- 18 Lao TT, Chan LY, Tam KF, Ho LF. Maternal hemoglobin and risk of gestational diabetes mellitus in Chinese women. *Obstet Gynecol* 2002;99:807-12.
- 19 Lao TT, Ho LF. Impact of iron deficiency anemia on prevalence of gestational diabetes mellitus. *Diabetes Care* 2004;27:650-6.
- 20 Arkkola T, Uusitalo U, Pietikainen M, Metsala J, Kronberg-Kippila C, Erkkola M, Veijola R, Knip M, Virtanen SM, Ovaskainen ML. Dietary intake and use of dietary supplements in relation to demographic variables among pregnant Finnish women. *Br J Nutr* 2006;96:913-20.

- 1  
2  
3 21 Bowers K, Yeung E, Williams MA, Qi L, Tobias DK, Hu FB, Zhang C. A prospective study  
4 of prepregnancy dietary iron intake and risk for gestational diabetes mellitus. *Diabetes Care*  
5 2011;34:1557-63.  
6  
7  
8  
9  
10 22 Bo S, Menato G, Villois P, Gambino R, Cassader M, Cotrino I, Cavallo-Perin P. Iron  
11 supplementation and gestational diabetes in midpregnancy. *Am J Obstet Gynecol*  
12 2009;201:158.e1-6.  
13  
14  
15  
16 23 Qiu C, Zhang C, Gelaye B, Enquobahrie DA, Frederick IO, Williams MA. Gestational  
17 diabetes mellitus in relation to maternal dietary heme iron and nonheme iron intake. *Diabetes*  
18 *Care* 2011;34:1564-9.  
19  
20  
21  
22  
23 24 Chan KK, Chan BC, Lam KF, Tam S, Lao TT. Iron supplement in pregnancy and  
24 development of gestational diabetes - a randomised placebo-controlled trial. *BJOG*  
25 2009;116:789-797.  
26  
27  
28  
29  
30 25 Luoto RM, Kinnunen TI, Aittasalo M, Ojala K, Mansikkamaki K, Toropainen E, Kolu P.  
31 Vasankari T. Prevention of gestational diabetes: design of a cluster-randomized controlled  
32 trial and one-year follow-up. *BMC Pregnancy & Childbirth*. 10:39, 2010.  
33  
34  
35  
36 26 Luoto R, Kinnunen TI, Aittasalo M, Kolu P, Raitanen J, Ojala K, Mansikkamaki K, Lamberg  
37 S, Vasankari T, Komulainen T, Tulokas S. Primary prevention of gestational diabetes mellitus  
38 and large-for-gestational-age newborns by lifestyle counseling: a cluster-randomized  
39 controlled trial. *PLoS Med* 2011;8:e1001036. doi:10.1371/journal.pmed.1001036  
40  
41  
42  
43  
44  
45 27 Kinnunen TI, Puhkala J, Raitanen J, Ahonen S, Aittasalo M, Virtanen SM, Luoto R. Effects  
46 of dietary counseling on food habits and dietary intake of Finnish pregnant women at  
47 increased risk for gestational diabetes – a cluster-randomized controlled trial. *Matern Child*  
48 *Nutr* 2012 (in press).  
49  
50  
51  
52  
53  
54 28 World Health Organization. Iron deficiency anaemia: assessment, prevention and control. A  
55 guide for programme managers. Geneva, World Health Organization 2001; WHO/NHD/01.3.  
56  
57  
58  
59  
60

- 1  
2  
3 29 Erkkola M, Karppinen M, Javanainen J, Rasanen L, Knip M, Virtanen SM. Validity and  
4 reproducibility of a food frequency questionnaire for pregnant Finnish women. *Am J*  
5 *Epidemiol* 2001;154:466-476.  
6  
7  
8  
9  
10 30 Ziemann M, Lizardo B, Geusendam G, Schlenke P. Reliability of capillary hemoglobin  
11 screening under routine conditions. *Transfusion* 2011;51:2714-9.  
12  
13  
14 31 Papanikolaou G, Pantopoulos K. Iron metabolism and toxicity. *Toxicol Appl Pharmacol*  
15 2005;202:199-211.  
16  
17  
18 32 Andrews NC. Disorders of iron metabolism. *N Engl J Med* 1999;341:1986-95.  
19  
20  
21 33 Fernandez-Real JM, Lopez-Bermejo A, Ricart W. Cross-talk between iron metabolism and  
22 diabetes. *Diabetes* 2002;51:2348-54.  
23  
24  
25 34 Cooksey RC, Jouihan HA, Ajioka RS, Hazel MW, Jones DL, Kushner JP, McClain DA.  
26 Oxidative stress, beta-cell apoptosis, and decreased insulin secretory capacity in mouse  
27 models of hemochromatosis. *Endocrinology* 2004;145:5305-12.  
28  
29  
30  
31  
32  
33  
34  
35  
36  
37  
38  
39  
40  
41  
42  
43  
44  
45  
46  
47  
48  
49  
50  
51  
52  
53  
54  
55  
56  
57  
58  
59  
60

1  
2  
3 **Figure legends**

4  
5 **Figure 1.** Total iron intake in mid pregnancy (26-28 weeks' gestation)

6  
7 **Figure 2.** Incidence of GDM (%) in fifths of total iron intake

8  
9  
10  
11  
12  
13  
14  
15  
16  
17  
18  
19  
20  
21  
22  
23  
24  
25  
26  
27  
28  
29  
30  
31  
32  
33  
34  
35  
36  
37  
38  
39  
40  
41  
42  
43  
44  
45  
46  
47  
48  
49  
50  
51  
52  
53  
54  
55  
56  
57  
58  
59  
60

For peer review only

**Table 1.** Background characteristics of iron intake groups (20%, 60% and 20%), means (SD) or frequencies (%)

|                                                     | 20%          | 60%                 | 20%           | P-value             |
|-----------------------------------------------------|--------------|---------------------|---------------|---------------------|
|                                                     | <14.2 mg/day | 14.2 – 109.9 mg/day | 110.0+ mg/day |                     |
|                                                     | (n=78)       | (n=233)             | (n=78)        |                     |
| Total Fe intake<br>(mg/day)                         | 11.6 (2.0)   | 36.0 (25.1)         | 136.2 (36.5)  | -                   |
| Primigravida                                        | 34 (43.6%)   | 96 (41.2%)          | 43 (55.1%)    | 0.099 <sup>2</sup>  |
| BMI (kg/m <sup>2</sup> )                            | 26.7 (4.4)   | 26.5 (4.7)          | 25.2 (4.3)    | 0.050 <sup>3</sup>  |
| Age (years)                                         | 29.3 (5.1)   | 29.8 (4.4)          | 29.6 (5.4)    | 0.70 <sup>3</sup>   |
| Diabetes in first- or<br>second-degree<br>relatives | 44 (57.1%)   | 127 (54.5%)         | 48 (61.5%)    | 0.55 <sup>2</sup>   |
| GDM or<br>macrosomia in<br>previous pregnancy       | 14 (18.2%)   | 33 (14.2%)          | 10 (12.8%)    | 0.60 <sup>2</sup>   |
| Hb (8-12 weeks <sup>1</sup> )<br>(g/l)              | 135.4 (9.6)  | 134.0 (10.9)        | 127.0 (10.0)  | <0.001 <sup>4</sup> |

<sup>1</sup> 16-18 for those with missing values at 8-12 weeks (n=28), missing: Hb n=5, 20 and 6, respectively

<sup>2</sup> Chi-square test, <sup>3</sup> Kruskal-Wallis test, <sup>4</sup> One-way ANOVA

**Table 2.** GDM frequency in iron intake groups (20%, 60% and 20%)

|                                                | N   | GDM, frequency (%) | P-value           |
|------------------------------------------------|-----|--------------------|-------------------|
| <b>All women</b>                               |     |                    |                   |
| (20%) <14.2 mg/day                             | 78  | 13 (16.7)          | 0.70 <sup>2</sup> |
| (60%) 14.2-109.9 mg/day                        | 233 | 39 (16.7)          |                   |
| (20%) 110.0+ mg/day                            | 78  | 16 (20.8)          |                   |
| <b>Hb (8-12 weeks<sup>1</sup>) &gt;120 g/l</b> |     |                    |                   |
| (20%) <14.2 mg                                 | 69  | 13 (18.8)          | 0.11 <sup>2</sup> |
| (60%) 14.2-109.9 mg                            | 194 | 30 (15.5)          |                   |
| (20%) 110.0+ mg                                | 58  | 16 (27.6)          |                   |
| <b>Hb (8-12 weeks<sup>1</sup>) ≤120 g/l</b>    |     |                    |                   |
| (20%) <14.2 mg                                 | 3   | 0                  | 0.45 <sup>3</sup> |
| (60%) 14.2-109.9 mg                            | 21  | 3 (14.3)           |                   |
| (20%) 110.0+ mg                                | 12  | 0                  |                   |

<sup>1</sup> 16-18 for those with missing values at 8-12 weeks (n=28)

<sup>2</sup> Chi-square test

<sup>3</sup> Fisher's exact test

**Table 3.** Incidence of GDM, unadjusted and adjusted ORs (95% CI) for iron intake at 26-28 weeks' gestation as a continuous and a categorical variable separately for all women and for women with haemoglobin >120 g/l

|                                                                      | Unadjusted OR (95% CI) | P-value | Adjusted OR (95% CI) <sup>2</sup> | P-value |
|----------------------------------------------------------------------|------------------------|---------|-----------------------------------|---------|
| <b>Fe intake as a continuous variable</b>                            |                        |         |                                   |         |
| <i>All women</i>                                                     |                        |         |                                   |         |
| Total Fe intake (mg/day)                                             | 1.004 (0.999 – 1.008)  | 0.16    | 1.005 (1.000 – 1.011)             | 0.041   |
| BMI                                                                  |                        |         | 1.11 (1.05 – 1.18)                | <0.001  |
| Age                                                                  |                        |         | 1.03 (0.97 – 1.09)                | 0.32    |
| Diabetes in first- or second-degree relatives                        |                        |         | 0.91 (0.52 – 1.59)                | 0.75    |
| GDM or macrosomia in a previous pregnancy                            |                        |         | 1.95 (0.97 – 3.89)                | 0.059   |
| <i>Women with Hb (8-12 weeks' gestation<sup>1</sup>) &gt;120 g/l</i> |                        |         |                                   |         |
| Total Fe intake (mg/day)                                             | 1.007 (1.001 – 1.012)  | 0.013   | 1.008 (1.003 – 1.014)             | 0.005   |
| BMI                                                                  |                        |         | 1.11 (1.04 – 1.18)                | 0.001   |
| Age                                                                  |                        |         | 1.03 (0.97 – 1.10)                | 0.28    |
| Diabetes in first- or second-degree relatives                        |                        |         | 0.80 (0.44 – 1.46)                | 0.46    |
| GDM or macrosomia in a previous pregnancy                            |                        |         | 2.03 (0.96 – 4.29)                | 0.065   |
| <b>Fe intake as a categorical variable</b>                           |                        |         |                                   |         |
| <i>All women</i>                                                     |                        |         |                                   |         |
| Total Fe intake (the highest 20% vs. the lowest 80%)                 | 1.31 (0.70 – 2.44)     | 0.40    | 1.55 (0.81 – 2.96)                | 0.19    |
| BMI                                                                  |                        |         | 1.11 (1.05 – 1.17)                | <0.001  |
| Age                                                                  |                        |         | 1.03 (0.97 – 1.09)                | 0.29    |
| Diabetes in first- or second-degree relatives                        |                        |         | 0.89 (0.51 – 1.55)                | 0.68    |
| GDM or macrosomia in a previous pregnancy                            |                        |         | 1.84 (0.92 – 3.64)                | 0.083   |
| <i>Women with Hb (8-12 weeks' gestation<sup>1</sup>) &gt;120 g/l</i> |                        |         |                                   |         |
| Total Fe intake (the highest 20% vs. the lowest 80%)                 | 1.95 (1.005 – 3.78)    | 0.048   | 2.21 (1.11 – 4.41)                | 0.025   |
| BMI                                                                  |                        |         | 1.10 (1.04 – 1.17)                | 0.002   |
| Age                                                                  |                        |         | 1.04 (0.98 – 1.10)                | 0.24    |
| Diabetes in first- or second-degree relatives                        |                        |         | 0.78 (0.43 – 1.41)                | 0.41    |
| GDM or macrosomia in a previous pregnancy                            |                        |         | 1.87 (0.89 – 3.93)                | 0.10    |

<sup>1</sup> 16-18 weeks' gestation for those with missing values at 8-12 weeks' gestation (n=28) <sup>2</sup> Adjusted for other variables in the model (total Fe intake, BMI, age, diabetes in first- or second-degree relatives and GDM or macrosomia in a previous pregnancy)

1  
2  
3  
4  
5  
6  
7  
8  
9  
10  
11  
12  
13  
14  
15  
16  
17  
18  
19  
20  
21  
22  
23  
24  
25  
26  
27  
28  
29  
30  
31  
32  
33  
34  
35  
36  
37  
38  
39  
40  
41  
42  
43  
44  
45  
46  
47  
48  
49  
50  
51  
52  
53  
54  
55  
56  
57  
58  
59  
60

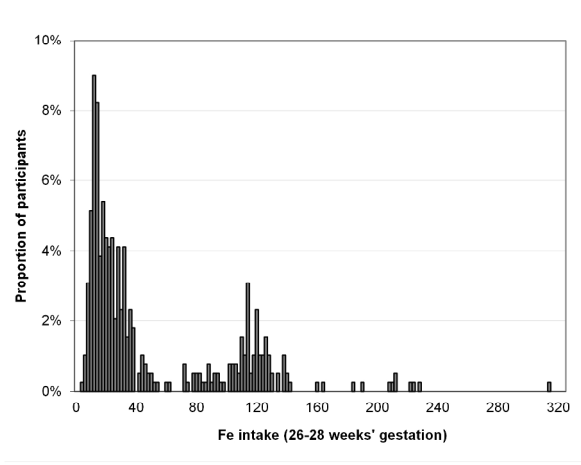

Total iron intake in mid pregnancy (26-28 weeks' gestation)  
209x297mm (300 x 300 DPI)



1  
2  
3  
4  
5  
6  
7  
8  
9  
10  
11  
12  
13  
14  
15  
16  
17  
18  
19  
20  
21  
22  
23  
24  
25  
26  
27  
28  
29  
30  
31  
32  
33  
34  
35  
36  
37  
38  
39  
40  
41  
42  
43  
44  
45  
46  
47  
48  
49  
50  
51  
52  
53  
54  
55  
56  
57  
58  
59  
60

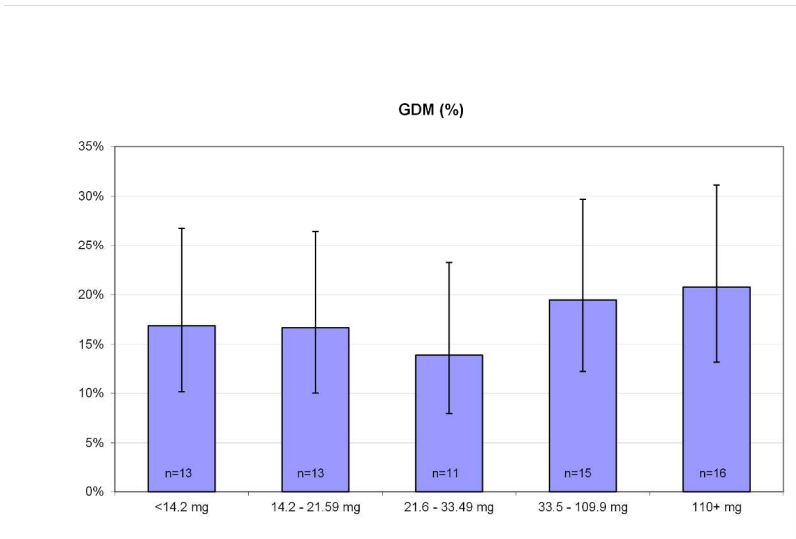

Incidence of GDM (%) in fifths of total iron intake  
209x297mm (300 x 300 DPI)

Annika Helin, Tarja I Kinnunen, Jani Raitanen, Riitta Luoto: **Iron intake, haemoglobin and risk of gestational diabetes: a prospective cohort study**

STROBE Statement—Checklist of items that should be included in reports of *cohort studies*

|                           | Item No | Recommendation                                                                                                                                                                                    | Reported on page No                        |
|---------------------------|---------|---------------------------------------------------------------------------------------------------------------------------------------------------------------------------------------------------|--------------------------------------------|
| <b>Title and abstract</b> | 1       | (a) Indicate the study's design with a commonly used term in the title or the abstract                                                                                                            | 1                                          |
|                           |         | (b) Provide in the abstract an informative and balanced summary of what was done and what was found                                                                                               | 2                                          |
| <b>Introduction</b>       |         |                                                                                                                                                                                                   |                                            |
| Background/rationale      | 2       | Explain the scientific background and rationale for the investigation being reported                                                                                                              | 3                                          |
| Objectives                | 3       | State specific objectives, including any prespecified hypotheses                                                                                                                                  | 4                                          |
| <b>Methods</b>            |         |                                                                                                                                                                                                   |                                            |
| Study design              | 4       | Present key elements of study design early in the paper                                                                                                                                           | 4,5                                        |
| Setting                   | 5       | Describe the setting, locations, and relevant dates, including periods of recruitment, exposure, follow-up, and data collection                                                                   | 4,5                                        |
| Participants              | 6       | (a) Give the eligibility criteria, and the sources and methods of selection of participants. Describe methods of follow-up                                                                        | 4                                          |
|                           |         | (b) For matched studies, give matching criteria and number of exposed and unexposed                                                                                                               |                                            |
| Variables                 | 7       | Clearly define all outcomes, exposures, predictors, potential confounders, and effect modifiers. Give diagnostic criteria, if applicable                                                          | 5,6                                        |
| Data sources/measurement  | 8*      | For each variable of interest, give sources of data and details of methods of assessment (measurement). Describe comparability of assessment methods if there is more than one group              | 5,6                                        |
| Bias                      | 9       | Describe any efforts to address potential sources of bias                                                                                                                                         | 10                                         |
| Study size                | 10      | Explain how the study size was arrived at                                                                                                                                                         | Luoto et al. 2010 (see list of references) |
| Quantitative variables    | 11      | Explain how quantitative variables were handled in the analyses. If applicable, describe which groupings were chosen and why                                                                      | 7,8                                        |
| Statistical methods       | 12      | (a) Describe all statistical methods, including those used to control for confounding                                                                                                             | 7,8                                        |
|                           |         | (b) Describe any methods used to examine subgroups and interactions                                                                                                                               | 7,8                                        |
|                           |         | (c) Explain how missing data were addressed                                                                                                                                                       | 5                                          |
|                           |         | (d) If applicable, explain how loss to follow-up was addressed                                                                                                                                    |                                            |
|                           |         | (e) Describe any sensitivity analyses                                                                                                                                                             | 7,8                                        |
| <b>Results</b>            |         |                                                                                                                                                                                                   |                                            |
| Participants              | 13*     | (a) Report numbers of individuals at each stage of study—eg numbers potentially eligible, examined for eligibility, confirmed eligible, included in the study, completing follow-up, and analysed | 5                                          |
|                           |         | (b) Give reasons for non-participation at each stage                                                                                                                                              | 5                                          |
|                           |         | (c) Consider use of a flow diagram                                                                                                                                                                |                                            |

|    |                          |     |                                                                                                                                                                                                              |                      |
|----|--------------------------|-----|--------------------------------------------------------------------------------------------------------------------------------------------------------------------------------------------------------------|----------------------|
| 1  | Descriptive data         | 14* | (a) Give characteristics of study participants (eg demographic, clinical, social) and information on exposures and potential confounders                                                                     | 8, Figure 1, Table 1 |
| 2  |                          |     | (b) Indicate number of participants with missing data for each variable of interest                                                                                                                          | 8, Table 1, Table 2  |
| 3  |                          |     | (c) Summarise follow-up time (eg, average and total amount)                                                                                                                                                  |                      |
| 4  | Outcome data             | 15* | Report numbers of outcome events or summary measures over time                                                                                                                                               | 8                    |
| 5  | Main results             | 16  | (a) Give unadjusted estimates and, if applicable, confounder-adjusted estimates and their precision (eg, 95% confidence interval). Make clear which confounders were adjusted for and why they were included | 9, Table 3           |
| 6  |                          |     | (b) Report category boundaries when continuous variables were categorized                                                                                                                                    | Table 1              |
| 7  |                          |     | (c) If relevant, consider translating estimates of relative risk into absolute risk for a meaningful time period                                                                                             |                      |
| 8  | Other analyses           | 17  | Report other analyses done—eg analyses of subgroups and interactions, and sensitivity analyses                                                                                                               | 9                    |
| 9  | <b>Discussion</b>        |     |                                                                                                                                                                                                              |                      |
| 10 | Key results              | 18  | Summarise key results with reference to study objectives                                                                                                                                                     | 10                   |
| 11 | Limitations              | 19  | Discuss limitations of the study, taking into account sources of potential bias or imprecision. Discuss both direction and magnitude of any potential bias                                                   | 10,11                |
| 12 | Interpretation           | 20  | Give a cautious overall interpretation of results considering objectives, limitations, multiplicity of analyses, results from similar studies, and other relevant evidence                                   | 10-13                |
| 13 | Generalisability         | 21  | Discuss the generalisability (external validity) of the study results                                                                                                                                        | 10,13                |
| 14 | <b>Other information</b> |     |                                                                                                                                                                                                              |                      |
| 15 | Funding                  | 22  | Give the source of funding and the role of the funders for the present study and, if applicable, for the original study on which the present article is based                                                | 14                   |

\*Give information separately for exposed and unexposed groups.

**Note:** An Explanation and Elaboration article discusses each checklist item and gives methodological background and published examples of transparent reporting. The STROBE checklist is best used in conjunction with this article (freely available on the Web sites of PLoS Medicine at <http://www.plosmedicine.org/>, Annals of Internal Medicine at <http://www.annals.org/>, and Epidemiology at <http://www.epidem.com/>). Information on the STROBE Initiative is available at <http://www.strobe-statement.org>.

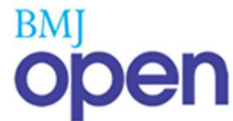

**Iron intake, haemoglobin and risk of gestational diabetes: a prospective cohort study**

|                                 |                                                                                                                                                                                                                                                                                                                                                                                                                                                                             |
|---------------------------------|-----------------------------------------------------------------------------------------------------------------------------------------------------------------------------------------------------------------------------------------------------------------------------------------------------------------------------------------------------------------------------------------------------------------------------------------------------------------------------|
| Journal:                        | <i>BMJ Open</i>                                                                                                                                                                                                                                                                                                                                                                                                                                                             |
| Manuscript ID:                  | bmjopen-2012-001730.R1                                                                                                                                                                                                                                                                                                                                                                                                                                                      |
| Article Type:                   | Research                                                                                                                                                                                                                                                                                                                                                                                                                                                                    |
| Date Submitted by the Author:   | 17-Aug-2012                                                                                                                                                                                                                                                                                                                                                                                                                                                                 |
| Complete List of Authors:       | Helin, Annika; University of Tampere, School of Health Sciences<br>Kinnunen, Tarja; University of Tampere, School of Health Sciences<br>Raitanen, Jani; University of Tampere, School of Health Sciences<br>Ahonen, Suvi; University of Tampere,, School of Health Sciences<br>Virtanen, Suvi; University of Tampere, School of Health Sciences; The National Institute for Health and Welfare, The Unit of Nutrition<br>Luoto, Riitta; UKK Institute for Health Promotion, |
| <b>Primary Subject Heading</b>: | Reproductive medicine, obstetrics and gynaecology                                                                                                                                                                                                                                                                                                                                                                                                                           |
| Secondary Subject Heading:      | Epidemiology, Diabetes and endocrinology, Nutrition and metabolism                                                                                                                                                                                                                                                                                                                                                                                                          |
| Keywords:                       | gestational diabetes , iron intake, iron supplementation, pregnancy, haemoglobin                                                                                                                                                                                                                                                                                                                                                                                            |
|                                 |                                                                                                                                                                                                                                                                                                                                                                                                                                                                             |

SCHOLARONE™  
Manuscripts

## Iron intake, haemoglobin and risk of gestational diabetes: a prospective cohort study

Annika Helin, MSc student<sup>1</sup>, Tarja I Kinnunen, university teacher<sup>1</sup>, Jani Raitanen, statistician<sup>1,2</sup>,  
Suvi Ahonen, researcher<sup>1,4</sup>, Suvi M Virtanen, research professor<sup>1,3,4</sup>, Riitta Luoto, research  
director<sup>2,5</sup>

### Affiliations:

<sup>1</sup> University of Tampere, School of Health Sciences, FI-33014 University of Tampere, Finland;

<sup>2</sup> The UKK Institute for Health Promotion Research, P. O. Box 30, FI-33501 Tampere, Finland;

<sup>3</sup> The National Institute for Health and Welfare, The Unit of Nutrition, P.O. Box 30, FI-00271  
Helsinki, Finland;

<sup>4</sup> Science Center of Pirkanmaa Hospital District, Tampere University Hospital, P. O. Box 2000, FI-  
33521 Tampere, Finland;

<sup>5</sup> The National Institute for Health and Welfare, The Unit of Sexual and Reproductive Health, P.O.  
Box 30, FI-00271, Helsinki, Finland

Correspondence to: Tarja Kinnunen [Tarja.I.Kinnunen@uta.fi](mailto:Tarja.I.Kinnunen@uta.fi)

The guarantor: Riitta Luoto

The Corresponding Author has the right to grant on behalf of all authors and does grant on behalf of all authors, an exclusive licence on a worldwide basis to the BMJ Publishing Group Ltd to permit this article (if accepted) to be published in BMJ editions and any other BMJ PGL products and sublicences such use and exploit all subsidiary rights, as set out in our licence.

**Keywords:** gestational diabetes, iron intake, iron supplementation, pregnancy, haemoglobin

Word count 3424

For peer review only

1  
2  
3  
4  
5  
6  
7  
8  
9  
10  
11  
12  
13  
14  
15  
16  
17  
18  
19  
20  
21  
22  
23  
24  
25  
26  
27  
28  
29  
30  
31  
32  
33  
34  
35  
36  
37  
38  
39  
40  
41  
42  
43  
44  
45  
46  
47  
48  
49  
50  
51  
52  
53  
54  
55  
56  
57  
58  
59  
60

**Abstract**

**Objective** To investigate the possible association between total daily iron intake during pregnancy, haemoglobin in early pregnancy and the risk of gestational diabetes mellitus (GDM) in women at increased risk of GDM.

**Design** A prospective cohort study (based on a cluster-randomised controlled trial, where the intervention and the usual care groups were combined).

**Setting** Primary health care maternity clinics in 14 municipalities in south-western Finland.

**Participants** 399 pregnant women who were at increased risk of GDM participated in a GDM prevention trial and were followed throughout pregnancy.

**Main outcome measurements** The main outcome was GDM diagnosed with oral glucose tolerance test at 26-28 weeks' gestation or based on a diagnosis recorded in the Finnish Medical Birth registry. Data on iron intake was collected using a 181-item food frequency questionnaire and separate questions for supplement use at 26-28 weeks' gestation.

**Results** GDM was diagnosed in 72 women (18.1%) in the study population. The odds ratio (OR) for total iron intake as a continuous variable was 1.006 (95% confidence interval 1.000 to 1.011; P=0.038) after adjustment for BMI, age, diabetes in first- or second-degree relatives, GDM or macrosomia in earlier pregnancy, total energy intake, dietary fibre, saturated fatty acids and total gestational weight gain. Women in the highest fifth of total daily iron intake had an adjusted OR of 1.66 (95% confidence interval 0.84 to 3.30; P=0.15) for GDM. After excluding participants with low haemoglobin levels ( $\leq 120$  g/l) already in early pregnancy the adjusted OR was 2.35 (95% confidence interval 1.13 to 4.92; P=0.023). **Conclusions** Our results suggest that high iron intake during pregnancy increases the risk of GDM especially in women who are not anaemic in early pregnancy and who are at increased risk of GDM. These findings suggest that routine iron supplementation should be reconsidered in this risk group of women.

**Trial registration: Current Controlled Trials ISRCTN33885819**

## ARTICLE SUMMARY

### Article focus

- The objective of this study was to investigate the possible association between total daily iron intake from both food and supplements during pregnancy, haemoglobin levels in early pregnancy and the risk of gestational diabetes in women at increased risk of GDM.

### Key messages

- Our results suggest that high iron intake during pregnancy increases the risk of GDM especially in women who are not anaemic in the beginning of the pregnancy and who are at increased risk of GDM.
- Our findings suggest that routine iron supplementation should be reconsidered in this risk group of women.

### Strengths and limitations of this study

#### Strengths:

- Unlike most of the previous studies we had detailed information of iron intake from both food and supplements.
- We had information of baseline OGTT and could therefore exclude women with undiagnosed prepregnancy diabetes. Additionally Finnish Medical Birth Registry could be utilized to cover those GDM cases that were undiagnosed in the 26-28 weeks' OGTT.
- We also had information of haemoglobin measurements of the study population during pregnancy although measured by nurses.
- All of our data was collected prospectively.
- The participation rate in the original trial was high (88% in both the intervention and the usual care groups) improving the generalisability of the results to other women with risk



1  
2  
3 factors for GDM.  
4  
5  
6

7 Limitations:  
8

9  
10 - Iron intake was assessed at a certain point in time, thus it does not cover the intake during  
11 the whole pregnancy.  
12

13  
14 - We could not assess iron absorption.  
15

16  
17 - The haemoglobin levels were screened at the maternity clinics using finger-stick samples,  
18 which may not be an optimal measurement tool.  
19

20  
21 Haemoglobin measurements were missing for 28 women at 8-12 weeks' gestation and we  
22 used the measurement at 16-18 weeks' gestation for those women.  
23  
24  
25  
26  
27  
28  
29  
30  
31  
32  
33  
34  
35  
36  
37  
38  
39  
40  
41  
42  
43  
44  
45  
46  
47  
48  
49  
50  
51  
52  
53  
54  
55  
56  
57  
58  
59  
60

## INTRODUCTION

Gestational diabetes mellitus (GDM) is a disturbance in glucose metabolism, which is diagnosed during pregnancy and affects 1-14% of pregnancies in different populations<sup>1</sup>. The incidence of gestational diabetes has been increasing the last 20 years<sup>2</sup>. Risk factors for GDM include higher maternal body mass index (BMI), higher age and family history of diabetes<sup>3</sup>. Approximately half of the GDM cases can be explained by overweight<sup>4</sup>. GDM causes short and long term risks to both the mother and the child. The most common result of GDM is newborn macrosomia, which increases several adverse outcomes during delivery such as shoulder dystocia, perineal lacerations, blood loss and increased caesarean birth<sup>5</sup>. GDM also increases the risk of glucose metabolism disorders and type 2 diabetes in later life of the mother and the newborn<sup>6,7</sup>.

High iron load and disorders of iron metabolism have been associated with an increased risk of disturbances in glucose metabolism<sup>8-10</sup>. In hereditary hemochromatosis iron accumulation in the body leads to diabetes in 30-60% of patients<sup>11</sup>. Also in animal models iron has been shown to induce diabetes<sup>12</sup>. Iron binding medication is effective in preventing diabetes in iron overload conditions<sup>13</sup>. Frequent blood donation has been shown to result in improvement in glucose metabolism even in healthy people<sup>14</sup>. Higher iron stores have been found in gestational diabetes patients measured most commonly by serum ferritin<sup>15-17</sup>. High haemoglobin level in early pregnancy has been reported to be an independent risk factor for GDM<sup>18</sup> and lower haemoglobin levels and anaemia during pregnancy have been shown to result in lower risk of GDM<sup>19</sup>. A large proportion of women, up to 78% in Finland<sup>20</sup>, use supplemental iron during pregnancy even with good haemoglobin levels and thus it is an important matter to investigate the possible adverse effects of iron. High iron intake could be especially risky for women with already good iron stores.

1  
2  
3 Studies of total iron intake and the risk of GDM are scarce: only Bowers et al.<sup>21</sup> have investigated  
4 pre-pregnancy total iron intake in relation to the risk of GDM. Other studies have investigated iron  
5 intake either from food or supplements only and have thus failed to report the effect of total iron  
6 intake<sup>22 23</sup>. Only one placebo controlled clinical trial has been conducted on supplemental iron and  
7 the risk of GDM<sup>24</sup>. To our knowledge there are no published studies of total iron intake during  
8 pregnancy, haemoglobin and the risk of GDM. The objective of this study was to investigate the  
9 possible association between total daily iron intake from both food and supplements during  
10 pregnancy, haemoglobin levels in early pregnancy and the risk of gestational diabetes in women at  
11 increased risk of GDM.  
12  
13  
14  
15  
16  
17  
18  
19  
20  
21  
22  
23  
24

## 25 MATERIAL AND METHDOS

26  
27  
28  
29 The data of this study was originally collected as a part of a larger gestational diabetes prevention  
30 trial, which is described in more detail elsewhere<sup>25</sup>. The effects of the intervention on GDM and  
31 newborns birthweight have been reported elsewhere<sup>26</sup>. This cluster-randomised trial was carried out  
32 in 14 municipalities in Pirkanmaa region in south-western Finland in 2007-2009. The municipalities  
33 were randomised in pairs into intervention and usual care municipalities.  
34  
35  
36  
37  
38  
39  
40  
41  
42

43 The inclusion criteria for the trial were to have at least one of the following risk factors: BMI  $\geq 25$   
44 kg/m<sup>2</sup>; age  $\geq 40$  years; GDM, glucose intolerance or newborn's macrosomia ( $\geq 4500$ g) in any earlier  
45 pregnancy or type 1 or 2 diabetes in first- or second-degree relatives. Women were excluded from  
46 the trial if they had an abnormal measurement in the baseline (8-12 weeks' gestation) glucose  
47 tolerance test (fasting blood glucose  $\geq 5.3$  mmol/l,  $>10.0$  mmol/l at 1 h or  $>8.6$  mmol/l at 2 h); pre-  
48 pregnancy diabetes (type 1 or 2); age  $<18$  years; no Finnish language skills; multiple pregnancy;  
49 restrictions from physical activity; substance abuse or psychiatric illness. The trial was approved by  
50  
51  
52  
53  
54  
55  
56  
57  
58  
59  
60

1  
2  
3 the ethical committee of Pirkanmaa Hospital District and written informed consent was provided by  
4  
5 the participants.  
6  
7

8  
9  
10 A total of 2271 women were screened for the study and of them 726 were preliminary eligible to  
11  
12 participate in the study<sup>26</sup>. Of these women 640 (88.2%) gave an informed consent to participate in  
13  
14 the trial. At the baseline (8-12 weeks' gestation) oral glucose tolerance test 174 women had an  
15  
16 abnormal result and were thus excluded. Furthermore 38 women had a miscarriage and 29 were lost  
17  
18 to follow-up. Finally, 399 participants were included in the analyses (219 in the intervention group  
19  
20 and 180 in the usual care group).  
21  
22

23  
24  
25 The intervention group participated in individual counselling on weight gain, physical activity and  
26  
27 diet on five antenatal visits in primary health care maternity clinics. The objectives of the  
28  
29 counselling were to guide the participants in monitoring their weight gain, increasing or  
30  
31 maintaining their leisure time physical activity and achieving a healthy diet fulfilling the national  
32  
33 recommendations. The effects of intensified dietary counselling on food habits and the intake of  
34  
35 energy, energy-yielding nutrients, fiber, selected fatty acids and cholesterol have been reported  
36  
37 elsewhere<sup>27</sup>. The counselling was not aiming to influence in iron intake. In this study the  
38  
39 intervention and usual care groups were combined and these groups had no differences in the  
40  
41 incidence of GDM or in iron intake.  
42  
43  
44

45  
46  
47 Background information of the participants was gathered with a baseline questionnaire at the first  
48  
49 prenatal visit (8-12 weeks' gestation). Information of pre-pregnancy BMI (weight self reported and  
50  
51 height measured at 8-12 weeks' visit) and haemoglobin were abstracted from maternity cards. In  
52  
53 this study we used information of haemoglobin measurements from early pregnancy (weeks 8-12,  
54  
55 or 16-18 for those with missing values for 8-12 weeks) to determine the status of body iron stores in  
56  
57  
58  
59  
60

1  
2  
3 the beginning of pregnancy and before the physiological decrease in haemoglobin levels. The  
4 participants were considered to have good haemoglobin levels if they had a haemoglobin  
5 measurement of over 120 g/l according to the lower limit for normal haemoglobin in non-pregnant  
6 women<sup>28</sup>. The limit for normal haemoglobin in pregnant women (110 g/l) was not used because of  
7 low frequency of cases with haemoglobin level under 110 g/l in early pregnancy (n=7). All women  
8 underwent a 75 g oral glucose tolerance test at 26-28 weeks' gestation. The criterion for gestational  
9 diabetes diagnosis was to have at least one abnormal value: fasting glucose after an overnight fast  
10  $\geq 5.3$  mmol/l, blood glucose  $>10.0$  mmol/l one hour after or  $>8.6$  mmol/l two hours after consuming  
11 75 g of glucose. To cover all possible cases information of gestational diabetes was abstracted from  
12 the Finnish Medical Birth Register.  
13  
14  
15  
16  
17  
18  
19  
20  
21  
22  
23  
24  
25  
26

27 Information on diet and supplement use was obtained by a validated 181-item food frequency  
28 questionnaire<sup>29</sup> although the validity of the supplement data was not assessed in the study by  
29 Erkkola et al. The participants completed the questionnaire at 8-12 weeks' gestation and again at  
30 26-28 and 36-37 weeks' gestation. In the 8-12 weeks' questionnaire the participants were asked  
31 about their dietary habits during one month before beginning of the pregnancy and in 26-28 and 36-  
32 37 weeks' questionnaires the participants were asked about their dietary habits during the previous  
33 month. The completed questionnaires were checked by a nutritionist and those with more than ten  
34 missing values in the frequency data were completed after consulting the participant on the phone.  
35 In the food frequency questionnaire the dietary habits were assessed by detailed questions of  
36 frequency of use (per day, week, month or not at all) and the portion sizes of specific food items.  
37 The participants were also asked to report their supplement use: brand name of the supplement,  
38 dosage and frequency of use (per day, week or month). The gathered data was then entered into a  
39 food database using a software program of the National Institute for Health and Welfare, Helsinki,  
40 Finland, and coded to daily food record form. Nutrient intakes were calculated by using the 10<sup>th</sup>  
41  
42  
43  
44  
45  
46  
47  
48  
49  
50  
51  
52  
53  
54  
55  
56  
57  
58  
59  
60

1  
2  
3 release (updated in 2009) of the Finnish Food Composition Database Fineli (www.fineli.fi) and in-  
4  
5 house software of the National Institute for Health and Welfare, Helsinki. In this study information  
6  
7 of dietary habits and supplement use at 26-28 weeks of gestation was used to get the best estimation  
8  
9 of iron intake and the intake of energy, macronutrients and dietary fibre during pregnancy and  
10  
11 before the onset of GDM.  
12

### 13 14 15 16 **Statistical methods**

17  
18 The study population was categorised into five equal groups according to their total daily iron  
19  
20 intake. To better see the differences between women in the highest fifth of total iron intake and the  
21  
22 other women, we combined the three groups in the middle (20, 60 and 20 percent). The groups were  
23  
24 tested for possible differences in risk factors, dietary intake and other background characteristics  
25  
26 using Chi-square test, Kruskal-Wallis test or One-way ANOVA. The incidence of GDM was then  
27  
28 investigated between the iron intake groups and the differences were tested statistically using Chi-  
29  
30 square test or Fisher exact test. Haemoglobin was considered as a potential effect modifier. Women  
31  
32 were divided into two groups according to their haemoglobin level in early pregnancy: >120 g/l or  
33  
34 ≤120 g/l.  
35  
36  
37  
38  
39

40  
41 Logistic regression was used to assess the odds ratio (OR) for gestational diabetes. The dependent  
42  
43 variable in the regression model was GDM (yes/no). In the first model iron intake was assessed as a  
44  
45 continuous variable. In the second model the highest fifth of total iron intake (intake ≥110 mg) was  
46  
47 compared to the rest of the study population (iron intake under 110 mg). The models were adjusted  
48  
49 for BMI, age, intake of energy, saturated fatty acids and dietary fibre and total gestational weight  
50  
51 gain (all as continuous) as well as diabetes in first- or second-degree relatives and GDM or  
52  
53 macrosomia in earlier pregnancy (both as categorical). Both models were executed separately for all  
54  
55  
56  
57  
58  
59  
60

1  
2  
3 women and for women with haemoglobin levels over 120 g/l in early pregnancy (8-12 or 16-18  
4  
5 weeks' gestation).  
6  
7  
8

9  
10 We also added interaction terms for iron intake and haemoglobin and for iron intake and BMI to the  
11 model but they were not statistically significant and therefore are not presented here. In sensitivity  
12 analyses, we examined the association between the total iron intake and the risk of GDM using  
13 alternative cut-off points for categorising participants based on their iron intake (15, 70 and 15  
14 percent; 25, 50 and 25 percent and 30, 40 and 30 percent) and the same statistical tests as described  
15 above. All analyses were performed with SPSS statistics (version 19).  
16  
17  
18  
19  
20  
21  
22  
23

## 24 25 **RESULTS**

26  
27  
28  
29 Based on the questionnaire completed at 26-28 weeks' gestation, the mean daily iron intake from  
30 food was 14.4 mg (SD 4.3; median 13.9 mg) among the study population. In the study group 65.7%  
31 of women used supplemental iron and the median of supplemental intake was 27.0 mg. The most  
32 used dosages for iron supplementation were 10.0 mg, 20.0 mg and 100.0 mg of elemental iron  
33 ( $\text{Fe}^{2+}$ ). The median for total iron intake was 27.1 mg (interquartile range 15.5-89.3 mg) (Figure 1).  
34 Iron intake from food was similar in nonusers and users of supplemental iron: users of supplemental  
35 iron had a mean daily intake of 14.5 mg (SD 4.5) and nonusers 14.3 mg (SD 3.9). The mean  
36 haemoglobin level of the study population in the beginning of pregnancy was 134 g/l (SD 11; min  
37 107 g/l; max 169 g/l).  
38  
39  
40  
41  
42  
43  
44  
45  
46  
47  
48  
49

50  
51 The oral glucose tolerance test at 26-28 weeks' gestation was abnormal in 14.0% of the study  
52 population (n=56, missing value for three women). Furthermore 16 women received a gestational  
53 diabetes diagnosis during their pregnancy. Figure 2 shows the incidence of GDM in fifths of total  
54  
55  
56  
57  
58  
59  
60

1  
2  
3 iron intake. There was a tendency for a higher incidence of GDM in the highest fifth of total iron  
4  
5 intake.

6  
7  
8  
9  
10 Between the iron intake groups (20%, 60% and 20%) there were no significant differences in terms  
11  
12 of proportion of primigravida, age, diabetes in first- or second-degree relatives or GDM or  
13  
14 macrosomia in earlier pregnancy (Table 1). Women in the highest iron intake group had a slightly  
15  
16 lower mean BMI as compared to other women ( $P=0.05$ ). Haemoglobin levels in early pregnancy  
17  
18 differed between the groups as expected ( $P<0.001$ ). With regard to differences in dietary intake,  
19  
20 women in the lowest iron intake group had lower total energy and dietary fibre intakes than the  
21  
22 other women whereas women in the highest iron intake group had higher intake of saturated fatty  
23  
24 acids than the other women. Total gestational weight gain did not differ between the iron intake  
25  
26 groups. Table 2 shows the incidence of GDM in the three iron intake groups. The incidence was  
27  
28 higher in the highest iron intake group (20.8%) compared to the other two groups (16.7% in both)  
29  
30 but the difference was not statistically significant ( $P=0.70$ ). When including women with  
31  
32 haemoglobin levels  $>120$  g/l in early pregnancy ( $n=321$ , mean Hb 135, SD 9), the difference  
33  
34 between the groups was even larger but still not statistically significant ( $P=0.11$ ).  
35  
36  
37  
38  
39

40  
41 The logistic regression model shows that after adjustment for potential risk factors and background  
42  
43 characteristics total iron intake was significantly and positively associated with gestational diabetes  
44  
45 mellitus (Table 3). When iron intake was used as a continuous variable the OR was 1.006 ( $P=0.038$ )  
46  
47 for all women and 1.009 ( $P=0.006$ ) for those with haemoglobin levels over 120 g/l. In the second  
48  
49 model the OR for GDM was 1.66 (95% confidence interval 0.84 to 3.30,  $P=0.15$ ) for the highest  
50  
51 fifth of iron intake among all women. After excluding women with low haemoglobin levels ( $\leq 120$   
52  
53 g/l) in early pregnancy the OR was 2.35 (95% confidence interval 1.13 to 4.92,  $P=0.023$ ).  
54  
55

56  
57 In sensitivity analyses the odds ratios were higher when 15% of women with the highest iron intake  
58  
59  
60



1  
2  
3 were compared to the rest 85% of women. The odds ratios were lower when 25% or 30% of women  
4  
5 with highest intake were compared to the rest 75% and 70% of women respectively (results not  
6  
7 shown).

## 11 DISCUSSION

12  
13  
14  
15  
16 In this study we investigated the possible association between total daily iron intake during  
17  
18 pregnancy, haemoglobin in early pregnancy and the risk of gestational diabetes. To our knowledge  
19  
20 there are no similar studies published previously. We discovered that there was a tendency for a  
21  
22 higher incidence of GDM in the highest fifth of total iron intake. High iron intake increased the risk  
23  
24 of GDM especially for those women who had good haemoglobin levels in early pregnancy: we  
25  
26 discovered a two-fold OR for GDM for women in the highest fifth of iron intake with a  
27  
28 haemoglobin level of over 120 g/l in early pregnancy.  
29  
30  
31  
32  
33

34 Our study has several strengths. Firstly unlike most of the previous studies we had detailed  
35  
36 information of iron intake from both food and supplements. Secondly we had information on  
37  
38 baseline OGTT and could therefore exclude women with undiagnosed prepregnancy diabetes.  
39  
40 Additionally Finnish Medical Birth Registry could be utilized to cover those GDM cases that were  
41  
42 undiagnosed in the 26-28 weeks' OGTT. We also had information of haemoglobin measurements  
43  
44 of the study population during pregnancy although measured by nurses. All of our data was  
45  
46 collected prospectively. The participation rate in the original trial was high (88% in both the  
47  
48 intervention and the usual care groups) improving the generalisability of the results to other women  
49  
50 with risk factors for GDM.  
51  
52  
53  
54  
55  
56  
57  
58  
59  
60

1  
2  
3 A limitation of this kind of study is that estimating iron intake during pregnancy can be challenging  
4 because dietary habits and use of supplements can vary a lot during pregnancy due to nausea and  
5 other changes in wellbeing. Iron intake was assessed at a certain point in time (at 26-28 weeks'  
6 gestation covering the previous month), thus it does not cover the intake during the whole  
7 pregnancy. In our study we decided to use information of iron intake in mid-pregnancy to get the  
8 best estimation on iron intake during pregnancy and before the onset of GDM. We did not use  
9 information of iron intake abstracted in the beginning of pregnancy because it covered only dietary  
10 habits and supplement use during one month before the pregnancy when use of supplemental iron is  
11 rare. However our information on iron intake covers only one month in the mid-pregnancy.  
12 Additionally we could not assess iron absorption, for example with blood measurements, which also  
13 can vary a lot depending on body iron status and the contents of meals.  
14  
15  
16  
17  
18  
19  
20  
21  
22  
23  
24  
25  
26  
27  
28

29 There are also limitations concerning the haemoglobin measurements used in our study. In the  
30 maternity clinics haemoglobin levels are usually screened with a capillary haemoglobin  
31 measurement using finger-stick samples. This method has been demonstrated to be reliable in  
32 determining haemoglobin values but it is however susceptible to handling errors<sup>30</sup> and therefore  
33 there can be variation in the test results. Additionally we had a lot of missing values in haemoglobin  
34 measurements and thus we decided to use the haemoglobin measurement at 16-18 weeks' gestation  
35 for those with missing values at weeks 8-12 (n= 28). Although measurements at weeks 16-18 do not  
36 present the haemoglobin levels at early pregnancy our objective was to analyse separately women  
37 who were not anaemic and thus including women who had a haemoglobin level of over 120 g/l still  
38 at weeks 16-18 would help us not to underestimate the proportion of women who were not anaemic  
39 in the beginning of the pregnancy. However for these reasons our results in respect of haemoglobin  
40 measurements should be considered with caution and further studies with reliable and  
41 comprehensive haemoglobin measurements are warranted to confirm our results.  
42  
43  
44  
45  
46  
47  
48  
49  
50  
51  
52  
53  
54  
55  
56  
57  
58  
59  
60

1  
2  
3  
4  
5 In a somewhat similar study Bo et al.<sup>22</sup> discovered that women who used supplemental iron during  
6 mid-pregnancy had a 2- to 3-fold risk of GDM. They however had no information of dietary intake  
7 of iron or haemoglobin levels or other measurements of iron stores. Their findings are however in  
8 line with our results which suggest that dietary intake could play a relatively small part in the  
9 association whereas high supplemental iron intake could be responsible for most of the increase in  
10 GDM risk. Somewhat different results have been reported recently by Bowers et al.<sup>21</sup> and Qiu et  
11 al.<sup>23</sup>. Bowers et al.<sup>21</sup> investigated dietary and supplemental iron intake during one year before  
12 pregnancy utilising the material from the Nurses Health study. They observed no significant effect  
13 of total, nonheme or supplemental iron intake on the risk of GDM. It can be argued though, that  
14 usually iron supplementation outside of pregnancy is more rare and concerns mainly those who are  
15 anaemic. However they did find a significant and positive association between heme iron intake and  
16 GDM. Similarly Qiu et al.<sup>23</sup> demonstrated an association between heme iron intake during the time  
17 before conception and in early pregnancy and the risk of GDM. To our knowledge only one placebo  
18 controlled clinical trial has been conducted to investigate the association between iron  
19 supplementation and GDM<sup>24</sup>. This study did not observe any association. However it can be argued  
20 that the intake of supplemental iron was quite low in this study because of only about 50%  
21 compliance to a daily supplement of 60 mg of elemental iron.  
22  
23  
24  
25  
26  
27  
28  
29  
30  
31  
32  
33  
34  
35  
36  
37  
38  
39  
40  
41  
42  
43  
44

45 Iron is a highly reactive component with a possibility to participate in harmful reactions<sup>31</sup>. The  
46 human body can excrete iron with very limited mechanisms and thus iron intake is highly regulated  
47 according to body iron needs<sup>32</sup>. Iron could interfere with glucose metabolism in several ways. For  
48 example following mechanisms have been proposed: Iron decreases insulin extraction and  
49 metabolism in the liver, which leads to peripheral hyperinsulinemia<sup>33</sup>. Iron overload results in  
50 oxidative stress in pancreatic  $\beta$ -cells, which leads to destruction of the pancreatic islets and thus  
51  
52  
53  
54  
55  
56  
57  
58  
59  
60

1  
2  
3 decreases insulin secretion<sup>34</sup>. The exact mechanisms, which link iron to diabetes are still unsolved.  
4  
5 However the association can be argued to be biologically plausible.  
6  
7

8  
9  
10 Accumulating body of evidence supports the hypothesis of excess iron as a risk factor for glucose  
11  
12 metabolism disorders such as gestational diabetes. Iron deficiency anaemia has been shown to  
13  
14 reduce the incidence of GDM<sup>19</sup>. Respectively high haemoglobin level (>130 g/l) in early pregnancy  
15  
16 has been demonstrated to be an independent risk factor for GDM<sup>18</sup>. It seems that iron can affect  
17  
18 glucose metabolism even with no overt iron overload. Women diagnosed with GDM have been  
19  
20 observed to have increased iron stores compared to women without GDM<sup>15 17</sup>. However many of  
21  
22 these studies have been cross-sectional and it has been criticised that higher serum ferritin levels  
23  
24 could in fact reflect inflammation in the body and could be rather a result than a cause for  
25  
26 diabetes<sup>16</sup>.  
27  
28

29  
30  
31 In summary it seems that high iron intake might be a factor, which increases the risk of GDM  
32  
33 especially in women with already good iron stores. Use of iron supplements during pregnancy is  
34  
35 common even in women with good haemoglobin levels. Our results suggest that routine use of iron  
36  
37 supplements should be reconsidered in non-anaemic women with risk factors for GDM. To confirm  
38  
39 the hypothesis there is need for a large prospective study – ideally a randomised controlled trial –  
40  
41 with reliable and comprehensive information on iron intake from food and supplements during  
42  
43 pregnancy accompanied with serum measurements to determine the level of body iron stores.  
44  
45  
46  
47

#### 48 49 **Author contributions**

50  
51 AH, TIK and RL designed and conducted research; AH and JR performed statistical analyses; AH  
52  
53 drafted the paper and revised it based on the comments from the other authors. SMV and SA were  
54  
55

1  
2  
3 responsible for the FFQ method and for dietary calculations. TIK and RL have the primary  
4  
5 responsibility for final content. All authors read, commented and approved the final manuscript.  
6  
7

### 8 9 **Acknowledgements**

10  
11 Jatta Puhkala is acknowledged for checking and coding the dietary data. We also sincerely thank all  
12  
13 the nurses of the participating maternity clinics for their invaluable work in implementing the study  
14  
15 protocol and the pregnant women who participated in the study.  
16  
17

### 18 19 20 **A competing interest declaration**

21  
22 All authors have completed the Unified Competing Interest form at  
23  
24 [www.icmje.org/coi\\_disclosure.pdf](http://www.icmje.org/coi_disclosure.pdf) (available on request from the corresponding author) and declare  
25  
26 that they have no financial or non-financial interests that may be relevant to the submitted work.  
27  
28  
29

### 30 31 **Funding**

32  
33 (Finnish) Diabetes Research Fund, Competitive Research Funding of the Tampere University  
34  
35 Hospital, Academy of Finland, Ministry of Education, and Ministry of Social Affairs and Health.  
36  
37 The views expressed in this paper are those of the authors and not necessarily those of the funders  
38  
39  
40

### 41 42 **Data Sharing Statement**

43  
44 Additional unpublished data from the study may be available and it can be enquired of the  
45  
46 authors.  
47  
48  
49  
50  
51  
52  
53  
54  
55  
56  
57  
58  
59  
60

**What is already known on this subject**

- High iron stores and high iron intake have been associated with the risk of GDM in several studies.
- Anaemia is known to result in lower incidence of GDM.
- There are no previous studies available in which total daily iron intake during pregnancy and haemoglobin levels have been studied in relation to GDM risk.

**What this study adds**

- Our results suggest that high iron intake during pregnancy increases the risk of GDM especially in women who are not anaemic in the beginning of the pregnancy and who are at increased risk of GDM.
- Our findings suggest that routine iron supplementation should be reconsidered in this risk group of women.

## References

- 1 American Diabetes Association. Diagnosis and classification of diabetes mellitus. *Diabetes Care* 2012;35(Suppl 1):S64-71.
- 2 Ferrara A. Increasing prevalence of gestational diabetes mellitus: a public health perspective. *Diabetes Care* 2007;30(Suppl 2):S141-6.
- 3 King H. Epidemiology of glucose intolerance and gestational diabetes in women of childbearing age. *Diabetes Care* 1998;21(Suppl. 2):B9–B13.
- 4 Kim SY, England L, Wilson HG, et al. Percentage of gestational diabetes mellitus attributable to overweight and obesity. *Am J Public Health* 2010;100:1047-52.
- 5 Stotland NE, Caughey AB, Breed EM, et al. Risk factors and obstetric complications associated with macrosomia. *Int J Gynaecol Obstet* 2004;87:220-6.
- 6 Lee AJ, Hiscock RJ, Wein P, et al. Gestational diabetes mellitus: clinical predictors and long-term risk of developing type 2 diabetes: a retrospective cohort study using survival analysis. *Diabetes Care* 2007;30:878-883.
- 7 Clausen TD, Mathiesen ER, Hansen T, et al. Overweight and the metabolic syndrome in adult offspring of women with diet-treated gestational diabetes mellitus or type 1 diabetes. *J Clin Endocrinol Metab* 2009;94:2464-2470.
- 8 Tuomainen TP, Nyysönen K, Salonen R, et al. Body iron stores are associated with serum insulin and blood glucose concentrations. Population study in 1,013 eastern Finnish men. *Diabetes Care* 1997;20:426-8.
- 9 Ford ES, Cogswell ME. Diabetes and serum ferritin concentration among U.S. adults. *Diabetes Care* 1999;22:1978-83.
- 10 Jiang R, Manson JE, Meigs JB, et al. Body iron stores in relation to risk of type 2 diabetes in apparently healthy women. *JAMA* 2004;291:711-7.

- 1  
2  
3 11 Powell LW, Yapp TR. Hemochromatosis. *Clinics in Liver Disease* 2000;4:211-28.  
4  
5 12 Awai M, Narasaki M, Yamanoi Y, Seno S. Induction of diabetes in animals by parenteral  
6 administration of ferric nitrilotriacetate. *Am J Pathol* 1979;95:663-73.  
7  
8  
9 13 Brittenham GM, Griffith PM, Nienhuis AW, et al. Efficacy of deferoxamine in preventing  
10 complications of iron overload in patients with thalassemia major. *N Engl J Med*  
11 1994;331:567-573.  
12  
13  
14 14 Fernandez-Real JM, Lopez-Bermejo A, Ricart W. Iron stores, blood donation, and insulin  
15 sensitivity and secretion. *Clin Chem* 2005;51:1201-5.  
16  
17  
18 15 Lao TT, Chan PL, Tam KF. Gestational diabetes mellitus in the last trimester – a feature of  
19 maternal iron excess?. *Diabet Med* 2001;18:218-23.  
20  
21  
22 16 Chen X, Scholl TO, Stein TP. Association of elevated serum ferritin levels and the risk of  
23 gestational diabetes mellitus in pregnant women: The Camden study. *Diabetes Care*  
24 2006;29:1077-82.  
25  
26  
27 17 Afkhami-Ardekani M, Rashidi M. Iron status in women with and without gestational diabetes  
28 mellitus. *J Diabetes Complications* 2009;23:194-8.  
29  
30  
31 18 Lao TT, Chan LY, Tam KF, et al. Maternal hemoglobin and risk of gestational diabetes  
32 mellitus in Chinese women. *Obstet Gynecol* 2002;99:807-12.  
33  
34  
35 19 Lao TT, Ho LF. Impact of iron deficiency anemia on prevalence of gestational diabetes  
36 mellitus. *Diabetes Care* 2004;27:650-6.  
37  
38  
39 20 Arkkola T, Uusitalo U, Pietikainen M, et al. Dietary intake and use of dietary supplements in  
40 relation to demographic variables among pregnant Finnish women. *Br J Nutr* 2006;96:913-20.  
41  
42  
43 21 Bowers K, Yeung E, Williams MA, et al. A prospective study of prepregnancy dietary iron  
44 intake and risk for gestational diabetes mellitus. *Diabetes Care* 2011;34:1557-63.  
45  
46  
47 22 Bo S, Menato G, Villois P, et al. Iron supplementation and gestational diabetes in  
48 midpregnancy. *Am J Obstet Gynecol* 2009;201:158.e1-6.  
49  
50  
51  
52  
53  
54  
55  
56  
57  
58  
59  
60



- 1  
2  
3 23 Qiu C, Zhang C, Gelaye B, et al. Gestational diabetes mellitus in relation to maternal dietary  
4 heme iron and nonheme iron intake. *Diabetes Care* 2011;34:1564-9.  
5  
6  
7 24 Chan KK, Chan BC, Lam KF, et al. Iron supplement in pregnancy and development of  
8 gestational diabetes - a randomised placebo-controlled trial. *BJOG* 2009;116:789-797.  
9  
10  
11 25 Luoto RM, Kinnunen TI, Aittasalo M, et al. Prevention of gestational diabetes: design of a  
12 cluster-randomized controlled trial and one-year follow-up. *BMC Pregnancy & Childbirth*.  
13 10:39, 2010.  
14  
15  
16 26 Luoto R, Kinnunen TI, Aittasalo M, et al. Primary prevention of gestational diabetes mellitus  
17 and large-for-gestational-age newborns by lifestyle counseling: a cluster-randomized  
18 controlled trial. *PLoS Med* 2011;8:e1001036. doi:10.1371/journal.pmed.1001036  
19  
20  
21  
22  
23 27 Kinnunen TI, Puhkala J, Raitanen J, et al. Effects of dietary counseling on food habits and  
24 dietary intake of Finnish pregnant women at increased risk for gestational diabetes – a cluster-  
25 randomized controlled trial. *Matern Child Nutr* 2012 (in press).  
26  
27  
28  
29  
30 28 World Health Organization. Iron deficiency anaemia: assessment, prevention and control. A  
31 guide for programme managers. Geneva, World Health Organization 2001; WHO/NHD/01.3.  
32  
33  
34 29 Erkkola M, Karppinen M, Javanainen J, et al. Validity and reproducibility of a food frequency  
35 questionnaire for pregnant Finnish women. *Am J Epidemiol* 2001;154:466-476.  
36  
37  
38  
39 30 Ziemann M, Lizardo B, Geusendam G, et al. Reliability of capillary hemoglobin screening  
40 under routine conditions. *Transfusion* 2011;51:2714-9.  
41  
42  
43  
44 31 Papanikolaou G, Pantopoulos K. Iron metabolism and toxicity. *Toxicol Appl Pharmacol*  
45 2005;202:199-211.  
46  
47  
48  
49 32 Andrews NC. Disorders of iron metabolism. *N Engl J Med* 1999;341:1986-95.  
50  
51  
52 33 Fernandez-Real JM, Lopez-Bermejo A, Ricart W. Cross-talk between iron metabolism and  
53 diabetes. *Diabetes* 2002;51:2348-54.  
54  
55  
56  
57  
58  
59  
60

- 1  
2  
3 34 Cooksey RC, Jouihan HA, Ajioka RS, et al. Oxidative stress, beta-cell apoptosis, and  
4  
5 decreased insulin secretory capacity in mouse models of hemochromatosis. *Endocrinology*  
6  
7 2004;145:5305-12.  
8  
9  
10  
11  
12  
13  
14  
15  
16  
17  
18  
19  
20  
21  
22  
23  
24  
25  
26  
27  
28  
29  
30  
31  
32  
33  
34  
35  
36  
37  
38  
39  
40  
41  
42  
43  
44  
45  
46  
47  
48  
49  
50  
51  
52  
53  
54  
55  
56  
57  
58  
59  
60

1  
2  
3 **Figure legends**

4  
5 **Figure 1.** Total iron intake in mid pregnancy (26-28 weeks' gestation)

6  
7 **Figure 2.** Incidence of GDM (%) in fifths of total iron intake

8  
9  
10  
11  
12  
13  
14  
15  
16  
17  
18  
19  
20  
21  
22  
23  
24  
25  
26  
27  
28  
29  
30  
31  
32  
33  
34  
35  
36  
37  
38  
39  
40  
41  
42  
43  
44  
45  
46  
47  
48  
49  
50  
51  
52  
53  
54  
55  
56  
57  
58  
59  
60

For peer review only

**Table 1.** Background characteristics of iron intake groups (20%, 60% and 20%), means (SD) or frequencies (%)

|                                                     | 20%          | 60%                 | 20%           | P-value             |
|-----------------------------------------------------|--------------|---------------------|---------------|---------------------|
|                                                     | <14.2 mg/day | 14.2 – 109.9 mg/day | 110.0+ mg/day |                     |
|                                                     | (n=78)       | (n=233)             | (n=78)        |                     |
| Total Fe intake<br>(mg/day)                         | 11.6 (2.0)   | 36.0 (25.1)         | 136.2 (36.5)  | -                   |
| Primigravida                                        | 34 (43.6%)   | 96 (41.2%)          | 43 (55.1%)    | 0.099 <sup>2</sup>  |
| BMI (kg/m <sup>2</sup> )                            | 26.7 (4.4)   | 26.5 (4.7)          | 25.2 (4.3)    | 0.050 <sup>3</sup>  |
| Age (years)                                         | 29.3 (5.1)   | 29.8 (4.4)          | 29.6 (5.4)    | 0.70 <sup>3</sup>   |
| Diabetes in first- or<br>second-degree<br>relatives | 44 (57.1%)   | 127 (54.5%)         | 48 (61.5%)    | 0.55 <sup>2</sup>   |
| GDM or<br>macrosomia in<br>previous pregnancy       | 14 (18.2%)   | 33 (14.2%)          | 10 (12.8%)    | 0.60 <sup>2</sup>   |
| Hb (8-12 weeks <sup>1</sup> )<br>(g/l)              | 135.4 (9.6)  | 134.0 (10.9)        | 127.0 (10.0)  | <0.001 <sup>4</sup> |
| Total energy intake<br>(MJ/day)                     | 8.3 (1.5)    | 10.1 (2.6)          | 9.9 (2.7)     | <0.001 <sup>3</sup> |
| Protein (E%) <sup>5</sup>                           | 18.0 (2.3)   | 18.0 (2.2)          | 18.1 (2.2)    | 0.81 <sup>4</sup>   |
| Carbohydrates<br>(E%)                               | 48.0 (4.4)   | 48.6 (4.8)          | 47.3 (4.9)    | 0.071 <sup>4</sup>  |
| Saccharose (E%)                                     | 10.7 (3.4)   | 10.6 (3.4)          | 10.8 (2.6)    | 0.54 <sup>3</sup>   |
| Dietary fibre                                       | 20.7 (6.0)   | 26.8 (9.2)          | 25.8 (8.6)    | <0.001 <sup>4</sup> |

(g/day)

|                                    |            |            |            |                    |
|------------------------------------|------------|------------|------------|--------------------|
| Total fat (E%)                     | 32.9 (4.0) | 32.3 (4.4) | 33.4 (4.1) | 0.099 <sup>4</sup> |
| Saturated fatty acids (E%)         | 12.7 (2.0) | 12.5 (2.7) | 13.3 (2.5) | 0.015 <sup>3</sup> |
| Monounsaturated fatty acids (E%)   | 12.1 (1.9) | 11.9 (1.8) | 12.2 (1.7) | 0.57 <sup>4</sup>  |
| Polyunsaturated fatty acids (E%)   | 5.2 (1.0)  | 5.0 (0.9)  | 5.0 (0.9)  | 0.85 <sup>4</sup>  |
| Total gestational weight gain (kg) | 14.1 (5.5) | 13.9 (5.3) | 14.5 (5.4) | 0.81 <sup>4</sup>  |

<sup>1</sup> 16-18 for those with missing values at 8-12 weeks (n=28), missing: Hb n=5, 20 and 6, respectively

<sup>2</sup> Chi-square test, <sup>3</sup> Kruskal-Wallis test, <sup>4</sup> One-way ANOVA, <sup>5</sup> Percentage of total energy intake. Data on dietary intake was collected by the food frequency questionnaire completed at 26-28 weeks' gestation. **Table 2.** GDM frequency in iron intake groups (20%, 60% and 20%)

|                                                | N   | GDM, frequency (%) | P-value           |
|------------------------------------------------|-----|--------------------|-------------------|
| <b>All women</b>                               |     |                    |                   |
| (20%) <14.2 mg/day                             | 78  | 13 (16.7)          | 0.70 <sup>2</sup> |
| (60%) 14.2-109.9 mg/day                        | 233 | 39 (16.7)          |                   |
| (20%) 110.0+ mg/day                            | 78  | 16 (20.8)          |                   |
| <b>Hb (8-12 weeks<sup>1</sup>) &gt;120 g/l</b> |     |                    |                   |
| (20%) <14.2 mg                                 | 69  | 13 (18.8)          | 0.11 <sup>2</sup> |
| (60%) 14.2-109.9 mg                            | 194 | 30 (15.5)          |                   |
| (20%) 110.0+ mg                                | 58  | 16 (27.6)          |                   |
| <b>Hb (8-12 weeks<sup>1</sup>) ≤120 g/l</b>    |     |                    |                   |
| (20%) <14.2 mg                                 | 3   | 0                  | 0.45 <sup>3</sup> |

|                     |    |          |
|---------------------|----|----------|
| (60%) 14.2-109.9 mg | 21 | 3 (14.3) |
| (20%) 110.0+ mg     | 12 | 0        |

---

<sup>1</sup> 16-18 for those with missing values at 8-12 weeks (n=28)

<sup>2</sup> Chi-square test

<sup>3</sup> Fisher's exact test

For peer review only

**Table 3.** Incidence of GDM, unadjusted and adjusted ORs (95% CI) for iron intake at 26-28 weeks' gestation as a continuous and a categorical variable separately for all women and for women with haemoglobin >120 g/l

|                                                                      | Unadjusted OR (95% CI) | P-value | Adjusted OR (95% CI) <sup>2</sup> | P-value |
|----------------------------------------------------------------------|------------------------|---------|-----------------------------------|---------|
| <b>Fe intake as a continuous variable</b>                            |                        |         |                                   |         |
| <i>All women</i>                                                     |                        |         |                                   |         |
| Total Fe intake (mg/day)                                             | 1.004 (0.999 – 1.008)  | 0.16    | 1.006 (1.000 – 1.011)             | 0.038   |
| BMI                                                                  |                        |         | 1.09 (1.02 – 1.16)                | 0.006   |
| Age                                                                  |                        |         | 1.01 (0.95 – 1.07)                | 0.78    |
| Diabetes in first- or second-degree relatives                        |                        |         | 0.87 (0.49 – 1.55)                | 0.63    |
| GDM or macrosomia in a previous pregnancy                            |                        |         | 1.77 (0.86 – 3.64)                | 0.12    |
| Total energy intake (MJ/day)                                         |                        |         | 0.89 (0.74 – 1.06)                | 0.19    |
| Dietary fibre (g/day)                                                |                        |         | 1.02 (0.97 – 1.08)                | 0.43    |
| Saturated fatty acids (E%) <sup>1</sup>                              |                        |         | 0.96 (0.84 – 1.09)                | 0.48    |
| Total gestational weight gain                                        |                        |         | 0.94 (0.89 – 1.00)                | 0.039   |
| <i>Women with Hb (8-12 weeks' gestation<sup>2</sup>) &gt;120 g/l</i> |                        |         |                                   |         |
| Total Fe intake (mg/day)                                             | 1.007 (1.001 – 1.012)  | 0.013   | 1.009 (1.003 – 1.015)             | 0.006   |
| BMI                                                                  |                        |         | 1.07 (1.00 – 1.15)                | 0.042   |
| Age                                                                  |                        |         | 1.01 (0.94 – 1.08)                | 0.78    |
| Diabetes in first- or second-degree relatives                        |                        |         | 0.73 (0.39 – 1.36)                | 0.32    |
| GDM or macrosomia in a previous pregnancy                            |                        |         | 1.78 (0.80 – 3.95)                | 0.16    |
| Total energy intake (MJ/day)                                         |                        |         | 0.83 (0.68 – 1.01)                | 0.066   |
| Dietary fibre (g/day)                                                |                        |         | 1.04 (0.99 – 1.10)                | 0.14    |
| Saturated fatty acids (E%) <sup>1</sup>                              |                        |         | 0.98 (0.84 – 1.13)                | 0.75    |
| Total gestational weight gain                                        |                        |         | 0.93 (0.88 – 0.99)                | 0.028   |
| <b>Fe intake as a categorical variable</b>                           |                        |         |                                   |         |
| <i>All women</i>                                                     |                        |         |                                   |         |
| Total Fe intake (the highest 20% vs. the lowest 80%)                 | 1.31 (0.70 – 2.44)     | 0.40    | 1.66 (0.84 – 3.30)                | 0.15    |
| BMI                                                                  |                        |         | 1.09 (1.02 – 1.15)                | 0.010   |
| Age                                                                  |                        |         | 1.01 (0.95 – 1.07)                | 0.77    |
| Diabetes in first- or second-degree relatives                        |                        |         | 0.84 (0.47 – 1.50)                | 0.55    |
| GDM or macrosomia in a previous pregnancy                            |                        |         | 1.65 (0.93 – 3.37)                | 0.17    |

|    |                                                                      |                     |       |                    |       |
|----|----------------------------------------------------------------------|---------------------|-------|--------------------|-------|
| 1  |                                                                      |                     |       |                    |       |
| 2  |                                                                      |                     |       |                    |       |
| 3  |                                                                      |                     |       |                    |       |
| 4  | Total energy intake (MJ/day)                                         |                     |       | 0.89 (0.80 – 1.06) | 0.19  |
| 5  | Dietary fibre (g/day)                                                |                     |       | 1.02 (0.97 – 1.08) | 0.37  |
| 6  | Saturated fatty acids (E%) <sup>1</sup>                              |                     |       | 0.97 (0.85 – 1.10) | 0.59  |
| 7  | Total gestational weight gain                                        |                     |       | 0.94 (0.89 – 0.99) | 0.029 |
| 8  |                                                                      |                     |       |                    |       |
| 9  | <i>Women with Hb (8-12 weeks' gestation<sup>2</sup>) &gt;120 g/l</i> |                     |       |                    |       |
| 10 | Total Fe intake (the highest 20% vs. the lowest 80%)                 | 1.95 (1.005 – 3.78) | 0.048 | 2.35 (1.13 – 4.92) | 0.023 |
| 11 | BMI                                                                  |                     |       | 1.07 (1.00 – 1.14) | 0.054 |
| 12 | Age                                                                  |                     |       | 1.01 (0.95 – 1.08) | 0.76  |
| 13 | Diabetes in first- or second-degree relatives                        |                     |       | 0.70 (0.38 – 1.31) | 0.27  |
| 14 | GDM or macrosomia in a previous pregnancy                            |                     |       | 1.60 (0.73 – 3.53) | 0.24  |
| 15 |                                                                      |                     |       |                    |       |
| 16 | Total energy intake (MJ/day)                                         |                     |       | 0.83 (0.69 – 1.02) | 0.071 |
| 17 | Dietary fibre (g/day)                                                |                     |       | 1.05 (0.99 – 1.11) | 0.10  |
| 18 | Saturated fatty acids (E%) <sup>1</sup>                              |                     |       | 0.99 (0.86 – 1.15) | 0.92  |
| 19 | Total gestational weight gain                                        |                     |       | 0.93 (0.87 – 0.99) | 0.017 |
| 20 |                                                                      |                     |       |                    |       |

<sup>1</sup> percentage of total energy intake

<sup>2</sup> 16-18 weeks' gestation for those with missing values at 8-12 weeks' gestation (n=28) <sup>2</sup> Adjusted for other variables in the model (total Fe intake, BMI, age, diabetes in first- or second-degree relatives, GDM or macrosomia in a previous pregnancy, total energy intake, dietary fibre, saturated fatty acids and total gestational weight gain)



## Iron intake, haemoglobin and risk of gestational diabetes: a prospective cohort study

Annika Helin, MSc student<sup>1</sup>, Tarja I Kinnunen, university teacher<sup>1</sup>, Jani Raitanen, statistician<sup>1,2</sup>,

[Suvi Ahonen, researcher<sup>1,4</sup>](#), [Suvi M Virtanen, research professor<sup>1,3,4</sup>](#), Riitta Luoto, research director<sup>2,5,3</sup>

### Affiliations:

<sup>1</sup> University of Tampere, School of Health Sciences, FI-33014 University of Tampere, Finland;

<sup>2</sup> The UKK Institute for Health Promotion Research, P. O. Box 30, FI-33501 Tampere, Finland;

<sup>3</sup> [The National Institute for Health and Welfare, The Unit of Nutrition, P.O. Box 30, FI-00271 Helsinki, Finland;](#)

<sup>4</sup> [Science Center of Pirkanmaa Hospital District, Tampere University Hospital, P. O. Box 2000, FI-33521 Tampere, Finland;](#)

<sup>5</sup> The National Institute for Health and Welfare, The Unit of Sexual and Reproductive Health, P.O. Box 30, FI-00271, Helsinki, Finland

Correspondence to: Tarja Kinnunen [Tarja.I.Kinnunen@uta.fi](mailto:Tarja.I.Kinnunen@uta.fi)

The guarantor: Riitta Luoto

The Corresponding Author has the right to grant on behalf of all authors and does grant on behalf of all authors, an exclusive licence on a worldwide basis to the BMJ Publishing Group Ltd to permit this article (if accepted) to be published in BMJ editions and any other BMJPG products and sublicences such use and exploit all subsidiary rights, as set out in our licence.

**Keywords:** gestational diabetes, iron intake, iron supplementation, pregnancy, haemoglobin

1  
2  
3  
4  
5 | Word count [33113424](#)  
6  
7  
8  
9  
10  
11  
12  
13  
14  
15  
16  
17  
18  
19  
20  
21  
22  
23  
24  
25  
26  
27  
28  
29  
30  
31  
32  
33  
34  
35  
36  
37  
38  
39  
40  
41  
42  
43  
44  
45  
46  
47  
48  
49  
50  
51  
52  
53  
54  
55  
56  
57  
58  
59  
60

For peer review only

## Abstract

**Objective** To investigate the possible association between total daily iron intake ~~from both food and supplements~~ during pregnancy, haemoglobin in early pregnancy and the risk of gestational diabetes mellitus (GDM) in women at increased risk of GDM.

**Design** A prospective cohort study (based on a cluster-randomised controlled trial, where the intervention and the usual care groups were combined).

**Setting** Primary health care maternity clinics in 14 municipalities in south-western Finland.

**Participants** 399 pregnant women who were at increased risk of GDM participated in a GDM prevention trial and were followed throughout pregnancy.

**Main outcome measurements** The main outcome was GDM diagnosed with oral glucose tolerance test at 26-28 weeks' gestation or based on a diagnosis recorded in the Finnish Medical Birth registry. Data on iron intake was collected using a 181-item food frequency questionnaire and separate questions for supplement use at 26-28 weeks' gestation.

**Results** GDM was diagnosed in 72 women (18.1%) in the study population. The odds ratio (OR) for total iron intake as a continuous variable was 1.0065 (95% confidence interval 1.000 to 1.011; P=0.0384) after adjustment for BMI, age, diabetes in first- or second-degree relatives ~~and~~, GDM or macrosomia in earlier pregnancy, total energy intake, dietary fibre, saturated fatty acids and total gestational weight gain. Women in the highest fifth of total daily iron intake had an adjusted OR of 1.6655 (95% confidence interval 0.841 to 3.30296; P=0.159) for GDM. After excluding participants with low haemoglobin levels ( $\leq 120$  g/l) already in early pregnancy the adjusted OR was 2.3524 (95% confidence interval 1.134 to 4.9244; P=0.0235).

**Conclusions** Our results suggest that high iron intake during pregnancy increases the risk of GDM especially in women who are not anaemic in early the beginning of the pregnancy and who are at increased risk of GDM. These findings suggest that routine iron supplementation should be reconsidered in this risk group of women.

**Trial registration: Current Controlled Trials ISRCTN33885819**

For peer review only

1  
2  
3  
4  
5  
6  
7  
8  
9  
10  
11  
12  
13  
14  
15  
16  
17  
18  
19  
20  
21  
22  
23  
24  
25  
26  
27  
28  
29  
30  
31  
32  
33  
34  
35  
36  
37  
38  
39  
40  
41  
42  
43  
44  
45  
46  
47  
48  
49  
50  
51  
52  
53  
54  
55  
56  
57  
58  
59  
60

## INTRODUCTION

Gestational diabetes mellitus (GDM) is a disturbance in glucose metabolism, which is diagnosed during pregnancy and affects 1-14% of pregnancies in different populations<sup>1</sup>. The incidence of gestational diabetes has been increasing the last 20 years<sup>2</sup>. Risk factors for GDM include higher maternal body mass index (BMI), higher age and family history of diabetes<sup>3</sup>. Approximately half of the GDM cases can be explained by overweight<sup>4</sup>. GDM causes short and long term risks to both the mother and the child. The most common result of GDM is newborn macrosomia, which increases several adverse outcomes during delivery such as shoulder dystocia, perineal lacerations, blood loss and increased caesarean birth<sup>5</sup>. GDM also increases the risk of glucose metabolism disorders and type 2 diabetes in later life of the mother and the newborn<sup>6,7</sup>.

High iron load and disorders of iron metabolism have been associated with an increased risk of disturbances in glucose metabolism<sup>8-10</sup>. In hereditary hemochromatosis iron accumulation in the body leads to diabetes in 30-60% of patients<sup>11</sup>. Also in animal models iron has been shown to induce diabetes<sup>12</sup>. Iron binding medication is effective in preventing diabetes in iron overload conditions<sup>13</sup>. Frequent blood donation has been shown to result in improvement in glucose metabolism even in healthy people<sup>14</sup>. Higher iron stores have been found in gestational diabetes patients measured most commonly by serum ferritin<sup>15-17</sup>. High haemoglobin level in early pregnancy has been reported to be an independent risk factor for GDM<sup>18</sup> and lower haemoglobin levels and anaemia during pregnancy have been shown to result in lower risk of GDM<sup>19</sup>. A large proportion of women, up to 78% in Finland<sup>20</sup>, use supplemental iron during pregnancy even with good haemoglobin levels and thus it is an important matter to investigate the possible adverse effects of iron. High iron intake could be especially risky for women with already good iron stores.

1  
2  
3 Studies of total iron intake and the risk of GDM are scarce: only Bowers et al.<sup>21</sup> have investigated  
4 pre-pregnancy total iron intake in relation to the risk of GDM. Other studies have investigated iron  
5 intake either from food or supplements only and have thus failed to report the effect of total iron  
6 intake<sup>22 23</sup>. Only one placebo controlled clinical trial has been conducted on supplemental iron and  
7 the risk of GDM<sup>24</sup>. To our knowledge there are no published studies of total iron intake during  
8 pregnancy, haemoglobin and the risk of GDM. The objective of this study was to investigate the  
9 possible association between total daily iron intake from both food and supplements during  
10 pregnancy, haemoglobin levels in early pregnancy and the risk of gestational diabetes in women at  
11 increased risk of GDM.  
12  
13  
14  
15  
16  
17  
18  
19  
20  
21  
22  
23

## 24 MATERIAL AND METHDOS

25  
26  
27  
28  
29 The data of this study was originally collected as a part of a larger gestational diabetes prevention  
30 trial, which is described in more detail elsewhere<sup>25</sup>. The effects of the intervention on GDM and  
31 newborns birthweight have been reported elsewhere<sup>26</sup>. This cluster-randomised trial was carried out  
32 in 14 municipalities in Pirkanmaa region in south-western Finland in 2007-2009. The municipalities  
33 were randomised in pairs into intervention and usual care municipalities.  
34  
35  
36  
37  
38  
39  
40  
41  
42

43 The inclusion criteria for the trial ~~was~~were to have at least one of the following risk factors: BMI  
44  $\geq 25$  kg/m<sup>2</sup>; age  $\geq 40$  years; GDM, glucose intolerance or newborn's macrosomia ( $\geq 4500$ g) in any  
45 earlier pregnancy or type 1 or 2 diabetes in first- or second-degree relatives. Women were excluded  
46 from the trial if they had an abnormal measurement in the baseline (8-12 weeks' gestation) glucose  
47 tolerance test (fasting blood glucose  $\geq 5.3$  mmol/l,  $>10.0$  mmol/l at 1 h or  $>8.6$  mmol/l at 2 h); pre-  
48 pregnancy diabetes (type 1 or 2); age  $<18$  years; no Finnish language skills; multiple pregnancy;  
49 restrictions from physical activity; substance abuse or psychiatric illness. The trial was approved by  
50  
51  
52  
53  
54  
55  
56  
57  
58  
59  
60

1  
2  
3 the ethical committee of Pirkanmaa Hospital District and written informed consent was provided by  
4  
5 the participants.  
6  
7

8  
9 A total of 2271 women were screened for the study and of them 726 were preliminary eligible to  
10  
11 participate in the study<sup>26</sup>. Of these women 640 (88.2%) gave an informed consent to participate in  
12  
13 the trial. At the baseline (8-12 weeks' gestation) oral glucose tolerance test 174 women had an  
14  
15 abnormal result and were thus excluded. Furthermore 38 women had a miscarriage and 29 were lost  
16  
17 to follow-up. Finally, 399 participants were included in the analyses (219 in the intervention group  
18  
19 and 180 in the usual care group).  
20  
21  
22

23  
24 The intervention group participated in individual counselling on weight gain, physical activity and  
25  
26 diet on five antenatal visits in primary health care maternity clinics. The objectives of the  
27  
28 counselling were to guide the participants in monitoring their weight gain, increasing or  
29  
30 maintaining their leisure time physical activity and achieving a healthy diet fulfilling the national  
31  
32 recommendations. The effects of intensified dietary counselling on food habits and the intake of  
33  
34 energy, energy-yielding nutrients, fiber, selected fatty acids and cholesterol have been reported  
35  
36 elsewhere<sup>27</sup>. The counselling was not aiming to influence iron intake. In this study the  
37  
38 intervention and usual care groups were combined and these groups had no differences in the  
39  
40 incidence of GDM or in iron intake.  
41  
42  
43  
44  
45  
46

47 Background information of the participants was gathered with a baseline questionnaire at the first  
48  
49 prenatal visit (8-12 weeks' gestation). Information of pre-pregnancy BMI (weight self reported and  
50  
51 height measured at 8-12 weeks' visit) and haemoglobin were abstracted from maternity cards. In  
52  
53 this study we used information of haemoglobin measurements from early pregnancy (weeks 8-12,  
54  
55 or 16-18 for those with missing values for 8-12 weeks) to determine the status of body iron stores in  
56  
57  
58  
59  
60

1  
2  
3 the beginning of pregnancy and before the physiological decrease in haemoglobin levels. The  
4  
5 participants were considered to have good haemoglobin levels if they had a haemoglobin  
6  
7 measurement of over 120 g/l according to the lower limit for normal haemoglobin in non-pregnant  
8  
9 women<sup>28</sup>. The limit for normal haemoglobin in pregnant women (110 g/l) was not used because of  
10  
11 low frequency of cases with haemoglobin level under 110 g/l in early pregnancy (n=7). All women  
12  
13 underwent a 75 g oral glucose tolerance test at 26-28 weeks' gestation. The criterion for gestational  
14  
15 diabetes diagnosis was to have at least one abnormal value: fasting glucose after an overnight fast  
16  
17  $\geq 5.3$  mmol/l, blood glucose  $> 10.0$  mmol/l one hour after or  $> 8.6$  mmol/l two hours after consuming  
18  
19 75 g of glucose. To cover all possible cases information of gestational diabetes was abstracted from  
20  
21 the Finnish Medical Birth Register.  
22  
23  
24  
25  
26

27 Information on nf diet and supplement use was obtained by a validated 181-item food frequency  
28  
29 questionnaire<sup>29</sup> although the validity of the supplement data was not assessed in the study by  
30  
31 Erkkola et al. The participants completed the questionnaire at 8-12 weeks' gestation and again at  
32  
33 26-28 and 36-37 weeks' gestation. In the 8-12 weeks' questionnaire the participants were asked  
34  
35 about their dietary habits during one month before beginning of the pregnancy and in 26-28 and 36-  
36  
37 37 weeks' questionnaires the participants were asked about their dietary habits during the previous  
38  
39 month. The completed questionnaires were checked by a nutritionist and those with more than ten  
40  
41 missing values in the frequency data were completed after consulting the participant on the phone.  
42  
43 In the food frequency questionnaire the dietary habits were assessed by detailed questions of  
44  
45 frequency of use (per day, week, month or not at all) and the portion sizes of specific food items.  
46  
47 The participants were also asked to report their supplement use: brand name of the supplement,  
48  
49 dosage and frequency of use (per day, week or month). The gathered data was then entered into a  
50  
51 food database using a software program of the National Institute for Health and Welfare, Helsinki,  
52  
53 Finland, and coded to daily food record form. Nutrient intakes were calculated by using the 10<sup>th</sup>  
54  
55  
56  
57  
58  
59  
60



1  
2  
3 release (updated in 2009) of the Finnish Food Composition Database Fineli (www.fineli.fi) and in-  
4  
5 house software of the National Institute for Health and Welfare, Helsinki. In this study information  
6  
7 of dietary habits and supplement use at 26-28 weeks of gestation was used to get the best estimation  
8  
9 of iron intake and the intake of energy, macronutrients and dietary fibre during pregnancy and  
10  
11 before the onset of GDM.  
12  
13

### 14 15 16 **Statistical methods**

17  
18 The study population was categorised into five equal groups according to their total daily iron  
19  
20 intake. To better see the differences between women in the highest fifth of total iron intake and the  
21  
22 other women, we combined the three groups in the middle (20, 60 and 20 percent). The groups were  
23  
24 tested for possible differences in risk factors, dietary intake and other background characteristics  
25  
26 using Chi-square test, Kruskal-Wallis test or One-way ANOVA. The incidence of GDM was then  
27  
28 investigated between the iron intake groups and the differences were tested statistically using Chi-  
29  
30 square test or Fisher exact test. Haemoglobin was considered as a potential effect modifier. Women  
31  
32 were divided into two groups according to their haemoglobin level in early pregnancy: >120 g/l or  
33  
34 ≤120 g/l.  
35  
36  
37  
38  
39

40  
41 Logistic regression was used to assess the odds ratio (OR) for gestational diabetes. The dependent  
42  
43 variable in the regression model was GDM (yes/no). In the first model iron intake was assessed as a  
44  
45 continuous variable. In the second model the highest fifth of total iron intake (intake ≥110 mg) was  
46  
47 compared to the rest of the study population (iron intake under 110 mg). The models were adjusted  
48  
49 for BMI, age ~~(both as continuous)~~, intake of energy, saturated fatty acids and dietary fibre and total  
50  
51 gestational weight gain (all as continuous) as well as diabetes in first- or second-degree relatives  
52  
53 and GDM or macrosomia in earlier pregnancy (both as categorical). Both models were executed  
54  
55  
56  
57  
58  
59  
60

1  
2  
3 separately for all women and for women with haemoglobin levels over 120 g/l in early pregnancy  
4  
5 (8-12 or 16-18 weeks' gestation).  
6  
7

8  
9 We also added interaction terms for iron intake and haemoglobin and for iron intake and BMI to the  
10 model but they were not statistically significant and therefore are not presented here. In sensitivity  
11 analyses, we examined the association between the total iron intake and the risk of GDM using  
12 alternative cut-off points for categorising participants based on their iron intake (15, 70 and 15  
13 percent; 25, 50 and 25 percent and 30, 40 and 30 percent) and the same statistical tests as described  
14 above. All analyses were performed with SPSS statistics (version 19).  
15  
16  
17  
18  
19  
20  
21  
22  
23

## 24 25 **RESULTS**

26  
27  
28  
29 Based on the questionnaire completed at 26-28 weeks' gestation, the mean daily iron intake from  
30 food was 14.4 mg (SD 4.3; median 13.9 mg) among the study population. In the study group 65.7%  
31 of women used supplemental iron and the median of supplemental intake was 27.0 mg. The most  
32 used dosages for iron supplementation were 10.0 mg, 20.0 mg and 100.0 mg of elemental iron  
33 ( $\text{Fe}^{2+}$ ). The median for total iron intake was 27.1 mg (interquartile range 15.5-89.3 mg) (Figure 1).  
34 Iron intake from food was similar in nonusers and users of supplemental iron: users of supplemental  
35 iron had a mean daily intake of 14.5 mg (SD 4.5) and nonusers 14.3 mg (SD 3.9). The mean  
36 haemoglobin level of the study population in the beginning of pregnancy was 134 g/l (SD 11; min  
37 107 g/l; max 169 g/l).  
38  
39  
40  
41  
42  
43  
44  
45  
46  
47  
48  
49

50  
51 The oral glucose tolerance test at 26-28 weeks' gestation was abnormal in 14.0% of the study  
52 population (n=56, missing value for three women). Furthermore 16 women received a gestational  
53 diabetes diagnosis during their pregnancy. Figure 2 shows the incidence of GDM in fifths of total  
54  
55  
56  
57  
58  
59  
60

1  
2  
3 iron intake. There was a tendency for a higher incidence of GDM in the highest fifth of total iron  
4  
5 intake.

6  
7  
8  
9  
10 Between the iron intake groups (20%, 60% and 20%) there were no significant differences in terms  
11  
12 of proportion of primigravida, age, diabetes in first- or second-degree relatives or GDM or  
13  
14 macrosomia in earlier pregnancy (Table 1). Women in the highest iron intake group had a slightly  
15  
16 lower mean BMI as compared to other women (P=0.05). Haemoglobin levels in early pregnancy  
17  
18 differed between the groups as expected (P<0.001). With regard to differences in dietary intake,  
19  
20 women in the lowest iron intake group had lower total energy and dietary fibre intakes than the  
21  
22 other women whereas women in the highest iron intake group had higher intake of saturated fatty  
23  
24 acids than the other women. Total gestational weight gain did not differ between the iron intake  
25  
26 groups. Table 2 shows the incidence of GDM in the three iron intake groups. The incidence was  
27  
28 higher in the highest iron intake group (20.8%) compared to the other two groups (16.7% in both)  
29  
30 but the difference was not statistically significant (P=0.70). When including~~After excluding those~~  
31  
32 women with ~~who had low~~ haemoglobin levels ( $\leq 120$  g/l) already in early pregnancy (n=321, mean  
33  
34 Hb 135, SD 9), the difference between the groups was even larger but still not statistically  
35  
36 significant (P=0.11).  
37  
38  
39  
40  
41  
42

43 The logistic regression model shows that after adjustment for potential risk factors and background  
44  
45 characteristics total iron intake was significantly and positively associated with gestational diabetes  
46  
47 mellitus (Table 3). When iron intake was used as a continuous variable the OR was 1.00~~65~~  
48  
49 (P=0.0~~3844~~) for all women and 1.00~~98~~ (P=0.00~~65~~) for those with haemoglobin levels over 120 g/l.  
50  
51 In the second model the OR for GDM was 1.~~6655~~ (95% confidence interval 0.8~~44~~ to ~~3.302~~.~~96~~,  
52  
53 P=0.1~~59~~) for the highest fifth of iron intake among all women. After excluding women with low  
54  
55  
56  
57  
58  
59  
60

1  
2  
3 haemoglobin levels ( $\leq 120$  g/l) in early pregnancy the OR was 2.~~3521~~ (95% confidence interval  
4  
5 1.1~~31~~ to 4.~~9241~~,  $P=0.0235$ ).  
6  
7

8  
9  
10 In sensitivity analyses the odds ratios were higher when 15% of women with the highest iron intake  
11 were compared to the rest 85% of women. The odds ratios were lower when 25% or 30% of women  
12 with highest intake were compared to the rest 75% and 70% of women respectively (results not  
13 shown).  
14  
15  
16  
17

## 20 DISCUSSION

21  
22  
23  
24  
25 In this study we investigated the possible association between total daily iron intake during  
26 pregnancy, haemoglobin in early pregnancy and the risk of gestational diabetes. To our knowledge  
27 there are no similar studies published previously. We discovered that there was a tendency for a  
28 higher incidence of GDM in the highest fifth of total iron intake. High iron intake increased the risk  
29 of GDM especially for those women who had good haemoglobin levels in early pregnancy: we  
30 discovered a two-fold OR for GDM for women in the highest fifth of iron intake with a  
31 haemoglobin level of over 120 g/l in early pregnancy.  
32  
33  
34  
35  
36  
37  
38  
39  
40  
41

42  
43 Our study has several strengths. Firstly unlike most of the previous studies we had detailed  
44 information of iron intake from both food and supplements. Secondly we had information on  
45 baseline OGTT and could therefore exclude women with undiagnosed prepregnancy diabetes.  
46  
47  
48 Additionally Finnish Medical Birth Registry could be utilized to cover those GDM cases that were  
49 undiagnosed in the 26-28 weeks' OGTT. We also had information of haemoglobin measurements  
50 of the study population during pregnancy although measured by nurses. All of our data was  
51 collected prospectively. The participation rate in the original trial was high (88% in both the  
52  
53  
54  
55  
56  
57  
58  
59  
60

1  
2  
3 intervention and the usual care groups) improving the generalisability of the results to other women  
4  
5 with risk factors for GDM.  
6  
7

8  
9 A limitation of this kind of study is that estimating iron intake during pregnancy can be challenging  
10 because dietary habits and use of supplements can vary a lot during pregnancy due to nausea and  
11 other changes in well-being. Iron intake was assessed at a certain point in time (at 26-28 weeks'  
12 gestation covering the previous month), thus it does not cover the intake during the whole  
13 pregnancy. In our study we decided to use information of iron intake in mid-pregnancy to get the  
14 best estimation on iron intake during pregnancy and before the onset of GDM. We did not use  
15 information of iron intake abstracted in the beginning of pregnancy because it covered only dietary  
16 habits and supplement use during one month before the pregnancy when use of supplemental iron is  
17 rare. However our information on iron intake covers only one month in the mid-pregnancy.  
18 Additionally we could not assess iron absorption, for example with blood measurements, which also  
19 can vary a lot depending on body iron status and the contents of meals.  
20  
21  
22  
23  
24  
25  
26  
27  
28  
29  
30  
31  
32  
33  
34  
35

36 There are also limitations concerning the haemoglobin measurements used in our study. In the  
37 maternity clinics haemoglobin levels are usually screened with a capillary haemoglobin  
38 measurement using finger-stick samples. This method has been demonstrated to be reliable in  
39 determining haemoglobin values but it is however susceptible to handling errors<sup>30</sup> and therefore  
40 there can be variation in the test results. Additionally we had a lot of missing values in haemoglobin  
41 measurements and thus we decided to use the haemoglobin measurement at 16-18 weeks' gestation  
42 for those with missing values at weeks 8-12 (n= 28). Although measurements at weeks 16-18 do not  
43 present the haemoglobin levels at early pregnancy our objective was to analyse separately women  
44 who were not anaemic and thus including women who had a haemoglobin level of over 120 g/l still  
45 at weeks 16-18 would help us not to underestimate the proportion of women who were not anaemic  
46  
47  
48  
49  
50  
51  
52  
53  
54  
55  
56  
57  
58  
59  
60

1  
2  
3 in the beginning of the pregnancy. However for these reasons our results in respect of haemoglobin  
4  
5 measurements should be considered with caution and further studies with reliable and  
6  
7 comprehensive haemoglobin measurements are warranted to confirm our results.  
8  
9

10  
11 In a somewhat similar study Bo et al.<sup>22</sup> discovered that women who used supplemental iron during  
12  
13 mid-pregnancy had a 2- to 3-fold risk of GDM. They however had no information of dietary intake  
14  
15 of iron or haemoglobin levels or other measurements of iron stores. Their findings are however in  
16  
17 line with our results which suggest that dietary intake could play a relatively small part in the  
18  
19 association whereas high supplemental iron intake could be responsible for most of the increase in  
20  
21 GDM risk. Somewhat different results have been reported recently by Bowers et al.<sup>21</sup> and Qiu et  
22  
23 al.<sup>23</sup>. Bowers et al.<sup>21</sup> investigated dietary and supplemental iron intake during one year before  
24  
25 pregnancy utilising the material from the Nurses Health study. They observed no significant effect  
26  
27 of total, nonheme or supplemental iron intake on the risk of GDM. It can be argued though, that  
28  
29 usually iron supplementation outside of pregnancy is more rare and concerns mainly those who are  
30  
31 anaemic. However they did find a significant and positive association between heme iron intake and  
32  
33 GDM. Similarly Qiu et al.<sup>23</sup> demonstrated an association between heme iron intake during the time  
34  
35 before conception and in early pregnancy and the risk of GDM. To our knowledge only one placebo  
36  
37 controlled clinical trial has been conducted to investigate the association between iron  
38  
39 supplementation and GDM<sup>24</sup>. This study did not observe any association. However it can be argued  
40  
41 that the intake of supplemental iron was quite low in this study because of only about 50%  
42  
43 compliance to a daily supplement of 60 mg of elemental iron.  
44  
45  
46  
47  
48  
49

50  
51 Iron is a highly reactive component with a possibility to participate in harmful reactions<sup>31</sup>. The  
52  
53 human body can excrete iron with very limited mechanisms and thus iron intake is highly regulated  
54  
55 according to body iron needs<sup>32</sup>. Iron could interfere with glucose metabolism in several ways. For  
56  
57  
58  
59  
60

1  
2  
3 example following mechanisms have been proposed: Iron decreases insulin extraction and  
4  
5 metabolism in the liver, which leads to peripheral hyperinsulinemia<sup>33</sup>. Iron overload results in  
6  
7 oxidative stress in pancreatic  $\beta$ -cells, which leads to destruction of the pancreatic islets and thus  
8  
9 decreases insulin secretion<sup>34</sup>. The exact mechanisms, which link iron to diabetes are still unsolved.  
10  
11 However the association can be argued to be biologically plausible.  
12  
13

14  
15  
16 Accumulating body of evidence supports the hypothesis of excess iron as a risk factor for glucose  
17  
18 metabolism disorders such as gestational diabetes. Iron deficiency anaemia has been shown to  
19  
20 reduce the incidence of GDM<sup>19</sup>. Respectively high haemoglobin level ( $>130$  g/l) in early pregnancy  
21  
22 has been demonstrated to be an independent risk factor for GDM<sup>18</sup>. It seems that iron can affect  
23  
24 glucose metabolism even with no overt iron overload. Women diagnosed with GDM have been  
25  
26 observed to have increased iron stores compared to women without GDM<sup>15 17</sup>. However many of  
27  
28 these studies have been cross-sectional and it has been criticised that higher serum ferritin levels  
29  
30 could in fact reflect inflammation in the body and could be rather a result than a cause for  
31  
32 diabetes<sup>16</sup>.  
33  
34  
35  
36  
37

38  
39 In summary it seems that high iron intake might be a factor, which increases the risk of GDM  
40  
41 especially in women with already good iron stores. Use of iron supplements during pregnancy is  
42  
43 common even in women with good haemoglobin levels. Our results suggest that routine use of iron  
44  
45 supplements should be reconsidered in non-anaemic women with risk factors for GDM. To confirm  
46  
47 the hypothesis there is need for a large prospective study – ideally a randomised controlled trial –  
48  
49 with reliable and comprehensive information on iron intake from food and supplements during  
50  
51 pregnancy accompanied with serum measurements to determine the level of body iron stores.  
52  
53  
54

#### 55 56 | **Author contributions** 57 58 59 60

1  
2  
3 AH, TIK and RL designed and conducted research; AH and JR performed statistical analyses; AH  
4 drafted the paper and revised it based on the comments from the other authors. SMV and SA were  
5 responsible for the FFQ method and for dietary calculations. TIK and RL have the primary  
6  
7  
8  
9 responsibility for final content. All authors read, commented and approved the final manuscript.  
10  
11

### 12 13 14 **Acknowledgements**

15  
16 ~~Suvi M Virtanen and Suvi Ahonen are acknowledged for their contribution for the FFQ method and~~  
17 ~~for dietary calculations.~~ Jatta Puhkala is acknowledged for checking and coding the dietary data.  
18  
19

20 We also sincerely thank all the nurses of the participating maternity clinics for their invaluable work  
21  
22 in implementing the study protocol and the pregnant women who participated in the study.  
23  
24

### 25 26 27 **A competing interest declaration**

28  
29 All authors have completed the Unified Competing Interest form at  
30  
31 www.icmje.org/coi\_disclosure.pdf (available on request from the corresponding author) and declare  
32  
33 that they have no financial or non-financial interests that may be relevant to the submitted work.  
34  
35  
36

### 37 38 **Funding**

39  
40 (Finnish) Diabetes Research Fund, Competitive Research Funding of the Tampere University  
41  
42 Hospital, Academy of Finland, Ministry of Education, and Ministry of Social Affairs and Health.  
43  
44 The views expressed in this paper are those of the authors and not necessarily those of the funders  
45  
46  
47  
48  
49  
50  
51  
52  
53  
54  
55  
56  
57  
58  
59  
60



**What is already known on this subject**

- High iron stores and high iron intake have been associated with the risk of GDM in several studies.
- Anaemia is known to result in lower incidence of GDM.
- There are no previous studies available in which total daily iron intake during pregnancy and haemoglobin levels have been studied in relation to GDM risk.

**What this study adds**

- Our results suggest that high iron intake during pregnancy increases the risk of GDM especially in women who are not anaemic in the beginning of the pregnancy and who are at increased risk of GDM.
- Our findings suggest that routine iron supplementation should be reconsidered in this risk group of women.

## References

- 1 American Diabetes Association. Diagnosis and classification of diabetes mellitus. *Diabetes Care* 2012;35(Suppl 1):S64-71.
- 2 Ferrara A. Increasing prevalence of gestational diabetes mellitus: a public health perspective. *Diabetes Care* 2007;30(Suppl 2):S141-6.
- 3 King H. Epidemiology of glucose intolerance and gestational diabetes in women of childbearing age. *Diabetes Care* 1998;21(Suppl. 2):B9–B13.
- 4 Kim SY, England L, Wilson HG, Bish C, Satten GA, Dietz P. Percentage of gestational diabetes mellitus attributable to overweight and obesity. *Am J Public Health* 2010;100:1047-52.
- 5 Stotland NE, Caughey AB, Breed EM, Escobar GJ. Risk factors and obstetric complications associated with macrosomia. *Int J Gynaecol Obstet* 2004;87:220-6.
- 6 Lee AJ, Hiscock RJ, Wein P, Walker SP, Permezel M. Gestational diabetes mellitus: clinical predictors and long-term risk of developing type 2 diabetes: a retrospective cohort study using survival analysis. *Diabetes Care* 2007;30:878-883.
- 7 Clausen TD, Mathiesen ER, Hansen T, Pedersen O, Jensen DM, Lauenborg J, Schmidt L, Damm P. Overweight and the metabolic syndrome in adult offspring of women with diet-treated gestational diabetes mellitus or type 1 diabetes. *J Clin Endocrinol Metab* 2009;94:2464-2470.
- 8 Tuomainen TP, Nyysönen K, Salonen R, Tervahauta A, Korpela H, Lakka T, Kaplan GA, Salonen JT. Body iron stores are associated with serum insulin and blood glucose concentrations. Population study in 1,013 eastern Finnish men. *Diabetes Care* 1997;20:426-8.
- 9 Ford ES, Cogswell ME. Diabetes and serum ferritin concentration among U.S. adults. *Diabetes Care* 1999;22:1978-83.

- 1  
2  
3 10 Jiang R, Manson JE, Meigs JB, Ma J, Rifai N, Hu FB. Body iron stores in relation to risk of  
4 type 2 diabetes in apparently healthy women. *JAMA* 2004;291:711-7.  
5  
6  
7 11 Powell LW, Yapp TR. Hemochromatosis. *Clinics in Liver Disease* 2000;4:211-28.  
8  
9  
10 12 Awai M, Narasaki M, Yamanoi Y, Seno S. Induction of diabetes in animals by parenteral  
11 administration of ferric nitrilotriacetate. *Am J Pathol* 1979;95:663-73.  
12  
13  
14 13 Brittenham GM, Griffith PM, Nienhuis AW, McLaren CE, Young NS, Tucker EE, Allen CJ,  
15 Farrell DE, Harris John W. Efficacy of deferoxamine in preventing complications of iron  
16 overload in patients with thalassemia major. *N Engl J Med* 1994;331:567-573.  
17  
18  
19 14 Fernandez-Real JM, Lopez-Bermejo A, Ricart W. Iron stores, blood donation, and insulin  
20 sensitivity and secretion. *Clin Chem* 2005;51:1201-5.  
21  
22  
23 15 Lao TT, Chan PL, Tam KF. Gestational diabetes mellitus in the last trimester – a feature of  
24 maternal iron excess?. *Diabet Med* 2001;18:218-23.  
25  
26  
27 16 Chen X, Scholl TO, Stein TP. Association of elevated serum ferritin levels and the risk of  
28 gestational diabetes mellitus in pregnant women: The Camden study. *Diabetes Care*  
29 2006;29:1077-82.  
30  
31  
32 17 Afkhami-Ardekani M, Rashidi M. Iron status in women with and without gestational diabetes  
33 mellitus. *J Diabetes Complications* 2009;23:194-8.  
34  
35  
36 18 Lao TT, Chan LY, Tam KF, Ho LF. Maternal hemoglobin and risk of gestational diabetes  
37 mellitus in Chinese women. *Obstet Gynecol* 2002;99:807-12.  
38  
39  
40 19 Lao TT, Ho LF. Impact of iron deficiency anemia on prevalence of gestational diabetes  
41 mellitus. *Diabetes Care* 2004;27:650-6.  
42  
43  
44 20 Arkkola T, Uusitalo U, Pietikainen M, Metsala J, Kronberg-Kippila C, Erkkola M, Veijola R,  
45 Knip M, Virtanen SM, Ovaskainen ML. Dietary intake and use of dietary supplements in  
46 relation to demographic variables among pregnant Finnish women. *Br J Nutr* 2006;96:913-20.  
47  
48  
49  
50  
51  
52  
53  
54  
55  
56  
57  
58  
59  
60

- 1  
2  
3 21 Bowers K, Yeung E, Williams MA, Qi L, Tobias DK, Hu FB, Zhang C. A prospective study  
4 of prepregnancy dietary iron intake and risk for gestational diabetes mellitus. *Diabetes Care*  
5 2011;34:1557-63.  
6  
7  
8  
9  
10 22 Bo S, Menato G, Villois P, Gambino R, Cassader M, Cotrino I, Cavallo-Perin P. Iron  
11 supplementation and gestational diabetes in midpregnancy. *Am J Obstet Gynecol*  
12 2009;201:158.e1-6.  
13  
14  
15  
16 23 Qiu C, Zhang C, Gelaye B, Enquobahrie DA, Frederick IO, Williams MA. Gestational  
17 diabetes mellitus in relation to maternal dietary heme iron and nonheme iron intake. *Diabetes*  
18 *Care* 2011;34:1564-9.  
19  
20  
21  
22  
23 24 Chan KK, Chan BC, Lam KF, Tam S, Lao TT. Iron supplement in pregnancy and  
24 development of gestational diabetes - a randomised placebo-controlled trial. *BJOG*  
25 2009;116:789-797.  
26  
27  
28  
29  
30 25 Luoto RM, Kinnunen TI, Aittasalo M, Ojala K, Mansikkamaki K, Toropainen E, Kolu P.  
31 Vasankari T. Prevention of gestational diabetes: design of a cluster-randomized controlled  
32 trial and one-year follow-up. *BMC Pregnancy & Childbirth*. 10:39, 2010.  
33  
34  
35  
36 26 Luoto R, Kinnunen TI, Aittasalo M, Kolu P, Raitanen J, Ojala K, Mansikkamaki K, Lamberg  
37 S, Vasankari T, Komulainen T, Tulokas S. Primary prevention of gestational diabetes mellitus  
38 and large-for-gestational-age newborns by lifestyle counseling: a cluster-randomized  
39 controlled trial. *PLoS Med* 2011;8:e1001036. doi:10.1371/journal.pmed.1001036  
40  
41  
42  
43  
44  
45 27 Kinnunen TI, Puhkala J, Raitanen J, Ahonen S, Aittasalo M, Virtanen SM, Luoto R. Effects  
46 of dietary counseling on food habits and dietary intake of Finnish pregnant women at  
47 increased risk for gestational diabetes – a cluster-randomized controlled trial. *Matern Child*  
48 *Nutr* 2012 (in press).  
49  
50  
51  
52  
53  
54 28 World Health Organization. Iron deficiency anaemia: assessment, prevention and control. A  
55 guide for programme managers. Geneva, World Health Organization 2001; WHO/NHD/01.3.  
56  
57  
58  
59  
60

- 1  
2  
3 29 Erkkola M, Karppinen M, Javanainen J, Rasanen L, Knip M, Virtanen SM. Validity and  
4 reproducibility of a food frequency questionnaire for pregnant Finnish women. *Am J*  
5 *Epidemiol* 2001;154:466-476.  
6  
7  
8  
9  
10 30 Ziemann M, Lizardo B, Geusendam G, Schlenke P. Reliability of capillary hemoglobin  
11 screening under routine conditions. *Transfusion* 2011;51:2714-9.  
12  
13  
14 31 Papanikolaou G, Pantopoulos K. Iron metabolism and toxicity. *Toxicol Appl Pharmacol*  
15 2005;202:199-211.  
16  
17  
18 32 Andrews NC. Disorders of iron metabolism. *N Engl J Med* 1999;341:1986-95.  
19  
20  
21 33 Fernandez-Real JM, Lopez-Bermejo A, Ricart W. Cross-talk between iron metabolism and  
22 diabetes. *Diabetes* 2002;51:2348-54.  
23  
24  
25 34 Cooksey RC, Jouihan HA, Ajioka RS, Hazel MW, Jones DL, Kushner JP, McClain DA.  
26 Oxidative stress, beta-cell apoptosis, and decreased insulin secretory capacity in mouse  
27 models of hemochromatosis. *Endocrinology* 2004;145:5305-12.  
28  
29  
30  
31  
32  
33  
34  
35  
36  
37  
38  
39  
40  
41  
42  
43  
44  
45  
46  
47  
48  
49  
50  
51  
52  
53  
54  
55  
56  
57  
58  
59  
60

1  
2  
3 **Figure legends**  
4

5 **Figure 1.** Total iron intake in mid pregnancy (26-28 weeks' gestation)  
6

7 **Figure 2.** Incidence of GDM (%) in fifths of total iron intake  
8  
9  
10  
11  
12  
13  
14  
15  
16  
17  
18  
19  
20  
21  
22  
23  
24  
25  
26  
27  
28  
29  
30  
31  
32  
33  
34  
35  
36  
37  
38  
39  
40  
41  
42  
43  
44  
45  
46  
47  
48  
49  
50  
51  
52  
53  
54  
55  
56  
57  
58  
59  
60

For peer review only

**Table 1.** Background characteristics of iron intake groups (20%, 60% and 20%), means (SD) or frequencies (%)

|                                                     | 20%               | 60%                 | 20%               | P-value                      |
|-----------------------------------------------------|-------------------|---------------------|-------------------|------------------------------|
|                                                     | <14.2 mg/day      | 14.2 – 109.9 mg/day | 110.0+ mg/day     |                              |
|                                                     | (n=78)            | (n=233)             | (n=78)            |                              |
| Total Fe intake<br>(mg/day)                         | 11.6 (2.0)        | 36.0 (25.1)         | 136.2 (36.5)      | -                            |
| Primigravida                                        | 34 (43.6%)        | 96 (41.2%)          | 43 (55.1%)        | 0.099 <sup>2</sup>           |
| BMI (kg/m <sup>2</sup> )                            | 26.7 (4.4)        | 26.5 (4.7)          | 25.2 (4.3)        | 0.050 <sup>3</sup>           |
| Age (years)                                         | 29.3 (5.1)        | 29.8 (4.4)          | 29.6 (5.4)        | 0.70 <sup>3</sup>            |
| Diabetes in first- or<br>second-degree<br>relatives | 44 (57.1%)        | 127 (54.5%)         | 48 (61.5%)        | 0.55 <sup>2</sup>            |
| GDM or<br>macrosomia in<br>previous pregnancy       | 14 (18.2%)        | 33 (14.2%)          | 10 (12.8%)        | 0.60 <sup>2</sup>            |
| Hb (8-12 weeks <sup>1</sup> )<br>(g/l)              | 135.4 (9.6)       | 134.0 (10.9)        | 127.0 (10.0)      | <0.001 <sup>4</sup>          |
| <u>Total energy intake</u><br><u>(MJ/day)</u>       | <u>8.3 (1.5)</u>  | <u>10.1 (2.6)</u>   | <u>9.9 (2.7)</u>  | <u>&lt;0.001<sup>3</sup></u> |
| <u>Protein (E%)<sup>5</sup></u>                     | <u>18.0 (2.3)</u> | <u>18.0 (2.2)</u>   | <u>18.1 (2.2)</u> | <u>0.81<sup>4</sup></u>      |
| <u>Carbohydrates</u><br><u>(E%)</u>                 | <u>48.0 (4.4)</u> | <u>48.6 (4.8)</u>   | <u>47.3 (4.9)</u> | <u>0.071<sup>4</sup></u>     |
| <u>Saccharose (E%)</u>                              | <u>10.7 (3.4)</u> | <u>10.6 (3.4)</u>   | <u>10.8 (2.6)</u> | <u>0.54<sup>3</sup></u>      |
| <u>Dietary fibre</u>                                | <u>20.7 (6.0)</u> | <u>26.8 (9.2)</u>   | <u>25.8 (8.6)</u> | <u>&lt;0.001<sup>4</sup></u> |

(g/day)

Total fat (E%)                      32.9 (4.0)                      32.3 (4.4)                      33.4 (4.1)                      0.099<sup>4</sup>

Saturated fatty acids (E%)                      12.7 (2.0)                      12.5 (2.7)                      13.3 (2.5)                      0.015<sup>3</sup>

Monounsaturated fatty acids (E%)                      12.1 (1.9)                      11.9 (1.8)                      12.2 (1.7)                      0.57<sup>4</sup>

Polyunsaturated fatty acids (E%)                      5.2 (1.0)                      5.0 (0.9)                      5.0 (0.9)                      0.85<sup>4</sup>

Total gestational weight gain (kg)                      14.1 (5.5)                      13.9 (5.3)                      14.5 (5.4)                      0.81<sup>4</sup>

<sup>1</sup> 16-18 for those with missing values at 8-12 weeks (n=28), missing: Hb n=5, 20 and 6, respectively

<sup>2</sup> Chi-square test, <sup>3</sup> Kruskal-Wallis test, <sup>4</sup> One-way ANOVA, <sup>5</sup> Percentage of total energy intake.

Data on dietary intake was collected by the food frequency questionnaire completed at 26-28 weeks' gestation.



**Table 2.** GDM frequency in iron intake groups (20%, 60% and 20%)

|                                                | N   | GDM, frequency (%) | P-value           |
|------------------------------------------------|-----|--------------------|-------------------|
| <b>All women</b>                               |     |                    |                   |
| (20%) <14.2 mg/day                             | 78  | 13 (16.7)          | 0.70 <sup>2</sup> |
| (60%) 14.2-109.9 mg/day                        | 233 | 39 (16.7)          |                   |
| (20%) 110.0+ mg/day                            | 78  | 16 (20.8)          |                   |
| <b>Hb (8-12 weeks<sup>1</sup>) &gt;120 g/l</b> |     |                    |                   |
| (20%) <14.2 mg                                 | 69  | 13 (18.8)          | 0.11 <sup>2</sup> |
| (60%) 14.2-109.9 mg                            | 194 | 30 (15.5)          |                   |
| (20%) 110.0+ mg                                | 58  | 16 (27.6)          |                   |
| <b>Hb (8-12 weeks<sup>1</sup>) ≤120 g/l</b>    |     |                    |                   |
| (20%) <14.2 mg                                 | 3   | 0                  | 0.45 <sup>3</sup> |
| (60%) 14.2-109.9 mg                            | 21  | 3 (14.3)           |                   |
| (20%) 110.0+ mg                                | 12  | 0                  |                   |

<sup>1</sup> 16-18 for those with missing values at 8-12 weeks (n=28)

<sup>2</sup> Chi-square test

<sup>3</sup> Fisher's exact test

**Table 3.** Incidence of GDM, unadjusted and adjusted ORs (95% CI) for iron intake at 26-28 weeks' gestation as a continuous and a categorical variable separately for all women and for women with haemoglobin >120 g/l

|                                                                        | Unadjusted OR (95% CI) | P-value | Adjusted OR (95% CI) <sup>2</sup>                    | P-value                              |
|------------------------------------------------------------------------|------------------------|---------|------------------------------------------------------|--------------------------------------|
| <b>Fe intake as a continuous variable</b>                              |                        |         |                                                      |                                      |
| <i>All women</i>                                                       |                        |         |                                                      |                                      |
| Total Fe intake (mg/day)                                               | 1.004 (0.999 – 1.008)  | 0.16    | <del>1.006 (1.000 – 1.011)</del><br><del>1.005</del> | <del>0.038</del><br><del>0.041</del> |
| BMI                                                                    |                        |         | <del>1.09 (1.02 – 1.16)</del><br><del>1.11</del>     | <del>0.006</del><br><del>&lt;</del>  |
| Age                                                                    |                        |         | <del>1.01 (0.95 – 1.07)</del><br><del>1.03</del>     | <del>0.78</del><br><del>0.3</del>    |
| Diabetes in first- or second-degree relatives                          |                        |         | <del>0.87 (0.49 – 1.55)</del><br><del>0.91</del>     | <del>0.63</del><br><del>0.7</del>    |
| GDM or macrosomia in a previous pregnancy                              |                        |         | <del>1.77 (0.86 – 3.64)</del><br><del>1.95</del>     | <del>0.12</del><br><del>0.0</del>    |
| <u>Total energy intake (MJ/day)</u>                                    |                        |         | <u>0.89 (0.74 – 1.06)</u>                            | <u>0.19</u>                          |
| <u>Dietary fibre (g/day)</u>                                           |                        |         | <u>1.02 (0.97 – 1.08)</u>                            | <u>0.43</u>                          |
| <u>Saturated fatty acids (E%)<sup>1</sup></u>                          |                        |         | <u>0.96 (0.84 – 1.09)</u>                            | <u>0.48</u>                          |
| <u>Total gestational weight gain</u>                                   |                        |         | <u>0.94 (0.89 – 1.00)</u>                            | <u>0.039</u>                         |
| <i>Women with Hb (8-12 weeks' gestation<sup>1,2</sup>) &gt;120 g/l</i> |                        |         |                                                      |                                      |
| Total Fe intake (mg/day)                                               | 1.007 (1.001 – 1.012)  | 0.013   | <del>1.009 (1.003 – 1.015)</del><br><del>1.008</del> | <del>0.006</del><br><del>0.005</del> |
| BMI                                                                    |                        |         | <del>1.07 (1.00 – 1.15)</del><br><del>1.11</del>     | <del>0.042</del><br><del>0.001</del> |
| Age                                                                    |                        |         | <del>1.01 (0.94 – 1.08)</del><br><del>1.03</del>     | <del>0.78</del><br><del>0.2</del>    |
| Diabetes in first- or second-degree relatives                          |                        |         | <del>0.73 (0.39 – 1.36)</del><br><del>0.80</del>     | <del>0.32</del><br><del>0.4</del>    |
| GDM or macrosomia in a previous pregnancy                              |                        |         | <del>1.78 (0.80 – 3.95)</del><br><del>2.03</del>     | <del>0.16</del><br><del>0.0</del>    |
| <u>Total energy intake (MJ/day)</u>                                    |                        |         | <u>0.83 (0.68 – 1.01)</u>                            | <u>0.066</u>                         |
| <u>Dietary fibre (g/day)</u>                                           |                        |         | <u>1.04 (0.99 – 1.10)</u>                            | <u>0.14</u>                          |
| <u>Saturated fatty acids (E%)<sup>1</sup></u>                          |                        |         | <u>0.98 (0.84 – 1.13)</u>                            | <u>0.75</u>                          |

1  
2  
3  
4  
5  
6  
7  
8  
9  
10  
11  
12  
13  
14  
15  
16  
17  
18  
19  
20  
21  
22  
23  
24  
25  
26  
27  
28  
29  
30  
31  
32  
33  
34  
35  
36  
37  
38  
39  
40  
41  
42  
43  
44  
45  
46  
47  
48  
49

|                                                                       |                     |       |                                                           |                                      |
|-----------------------------------------------------------------------|---------------------|-------|-----------------------------------------------------------|--------------------------------------|
| <u>Total gestational weight gain</u>                                  |                     |       | <u>0.93 (0.88 – 0.99)</u>                                 | <u>0.028</u>                         |
| <b>Fe intake as a categorical variable</b>                            |                     |       |                                                           |                                      |
| <i>All women</i>                                                      |                     |       |                                                           |                                      |
| Total Fe intake (the highest 20% vs. the lowest 80%)                  | 1.31 (0.70 – 2.44)  | 0.40  | <del>1.66 (0.84 – 3.30)</del><br><del>(0.81 – 2.96)</del> | <del>0.150</del><br><del>9</del>     |
| BMI                                                                   |                     |       | <del>1.09 (1.02 – 1.15)</del><br><del>(1.05 – 1.17)</del> | <del>0.010</del><br><del>0.004</del> |
| Age                                                                   |                     |       | <del>1.01 (0.95 – 1.07)</del><br><del>(0.97 – 1.09)</del> | <del>0.770</del><br><del>9</del>     |
| Diabetes in first- or second-degree relatives                         |                     |       | <del>0.84 (0.47 – 1.50)</del><br><del>(0.51 – 1.55)</del> | <del>0.550</del><br><del>8</del>     |
| GDM or macrosomia in a previous pregnancy                             |                     |       | <del>1.65 (0.93 – 3.37)</del><br><del>(0.92 – 3.64)</del> | <del>0.170</del><br><del>83</del>    |
| Total energy intake (MJ/day)                                          |                     |       | <del>0.89 (0.80 – 1.06)</del><br><del>(0.97 – 1.08)</del> | <del>0.190</del><br><del>7</del>     |
| Dietary fibre (g/day)                                                 |                     |       | <del>1.02 (0.97 – 1.08)</del><br><del>(0.85 – 1.10)</del> | <del>0.370</del><br><del>9</del>     |
| Saturated fatty acids (E%) <sup>†</sup>                               |                     |       | <del>0.97 (0.85 – 1.10)</del><br><del>(0.89 – 0.99)</del> | <del>0.590</del><br><del>29</del>    |
| <i>Women with Hb (8-12 weeks' gestation<sup>24</sup>) &gt;120 g/l</i> |                     |       |                                                           |                                      |
| Total Fe intake (the highest 20% vs. the lowest 80%)                  | 1.95 (1.005 – 3.78) | 0.048 | <del>2.35 (1.13 – 4.92)</del><br><del>(1.11 – 4.41)</del> | <del>0.0230</del><br><del>025</del>  |
| BMI                                                                   |                     |       | <del>1.07 (1.00 – 1.14)</del><br><del>(1.04 – 1.17)</del> | <del>0.0540</del><br><del>002</del>  |
| Age                                                                   |                     |       | <del>1.01 (0.95 – 1.08)</del><br><del>(0.98 – 1.10)</del> | <del>0.760</del><br><del>4</del>     |
| Diabetes in first- or second-degree relatives                         |                     |       | <del>0.70 (0.38 – 1.31)</del><br><del>(0.43 – 1.41)</del> | <del>0.270</del><br><del>4</del>     |
| GDM or macrosomia in a previous pregnancy                             |                     |       | <del>1.60 (0.73 – 3.53)</del><br><del>(0.89 – 3.93)</del> | <del>0.240</del><br><del>0</del>     |
| <u>Total energy intake (MJ/day)</u>                                   |                     |       | <u>0.83 (0.69 – 1.02)</u>                                 | <u>0.071</u>                         |
| <u>Dietary fibre (g/day)</u>                                          |                     |       | <u>1.05 (0.99 – 1.11)</u>                                 | <u>0.10</u>                          |
| <u>Saturated fatty acids (E%)<sup>†</sup></u>                         |                     |       | <u>0.99 (0.86 – 1.15)</u>                                 | <u>0.92</u>                          |

Total gestational weight gain 0.93 (0.87 – 0.99) 0.017

<sup>1</sup> percentage of total energy intake

<sup>2</sup> 16-18 weeks' gestation for those with missing values at 8-12 weeks' gestation (n=28) <sup>2</sup> Adjusted for other variables in the model (total Fe intake, BMI, age, diabetes in first- or second-degree relatives ~~and~~, GDM or macrosomia in a previous pregnancy, total energy intake, dietary fibre, saturated fatty acids and total gestational weight gain)

For peer review only

1  
2  
3  
4  
5  
6  
7  
8  
9  
10  
11  
12  
13  
14  
15  
16  
17  
18  
19  
20  
21  
22  
23  
24  
25  
26  
27  
28  
29  
30  
31  
32  
33  
34  
35  
36  
37  
38  
39  
40  
41  
42  
43  
44  
45  
46  
47  
48  
49  
50  
51  
52  
53  
54  
55  
56  
57  
58  
59  
60



Total iron intake in mid pregnancy (26-28 weeks' gestation)  
209x297mm (300 x 300 DPI)

1  
2  
3  
4  
5  
6  
7  
8  
9  
10  
11  
12  
13  
14  
15  
16  
17  
18  
19  
20  
21  
22  
23  
24  
25  
26  
27  
28  
29  
30  
31  
32  
33  
34  
35  
36  
37  
38  
39  
40  
41  
42  
43  
44  
45  
46  
47  
48  
49  
50  
51  
52  
53  
54  
55  
56  
57  
58  
59  
60

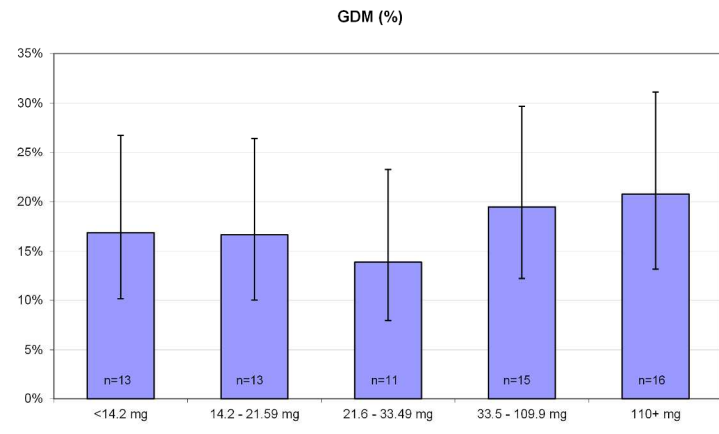

Incidence of GDM (%) in fifths of total iron intake  
209x297mm (300 x 300 DPI)

Annika Helin, Tarja I Kinnunen, Jani Raitanen, Riitta Luoto: **Iron intake, haemoglobin and risk of gestational diabetes: a prospective cohort study**

STROBE Statement—Checklist of items that should be included in reports of *cohort studies*

|                           | Item No | Recommendation                                                                                                                                                                                    | Reported on page No                        |
|---------------------------|---------|---------------------------------------------------------------------------------------------------------------------------------------------------------------------------------------------------|--------------------------------------------|
| <b>Title and abstract</b> | 1       | (a) Indicate the study's design with a commonly used term in the title or the abstract                                                                                                            | 1                                          |
|                           |         | (b) Provide in the abstract an informative and balanced summary of what was done and what was found                                                                                               | 2                                          |
| <b>Introduction</b>       |         |                                                                                                                                                                                                   |                                            |
| Background/rationale      | 2       | Explain the scientific background and rationale for the investigation being reported                                                                                                              | 3                                          |
| Objectives                | 3       | State specific objectives, including any prespecified hypotheses                                                                                                                                  | 4                                          |
| <b>Methods</b>            |         |                                                                                                                                                                                                   |                                            |
| Study design              | 4       | Present key elements of study design early in the paper                                                                                                                                           | 4,5                                        |
| Setting                   | 5       | Describe the setting, locations, and relevant dates, including periods of recruitment, exposure, follow-up, and data collection                                                                   | 4,5                                        |
| Participants              | 6       | (a) Give the eligibility criteria, and the sources and methods of selection of participants. Describe methods of follow-up                                                                        | 4                                          |
|                           |         | (b) For matched studies, give matching criteria and number of exposed and unexposed                                                                                                               |                                            |
| Variables                 | 7       | Clearly define all outcomes, exposures, predictors, potential confounders, and effect modifiers. Give diagnostic criteria, if applicable                                                          | 5,6                                        |
| Data sources/measurement  | 8*      | For each variable of interest, give sources of data and details of methods of assessment (measurement). Describe comparability of assessment methods if there is more than one group              | 5,6                                        |
| Bias                      | 9       | Describe any efforts to address potential sources of bias                                                                                                                                         | 10                                         |
| Study size                | 10      | Explain how the study size was arrived at                                                                                                                                                         | Luoto et al. 2010 (see list of references) |
| Quantitative variables    | 11      | Explain how quantitative variables were handled in the analyses. If applicable, describe which groupings were chosen and why                                                                      | 7,8                                        |
| Statistical methods       | 12      | (a) Describe all statistical methods, including those used to control for confounding                                                                                                             | 7,8                                        |
|                           |         | (b) Describe any methods used to examine subgroups and interactions                                                                                                                               | 7,8                                        |
|                           |         | (c) Explain how missing data were addressed                                                                                                                                                       | 5                                          |
|                           |         | (d) If applicable, explain how loss to follow-up was addressed                                                                                                                                    |                                            |
|                           |         | (e) Describe any sensitivity analyses                                                                                                                                                             | 7,8                                        |
| <b>Results</b>            |         |                                                                                                                                                                                                   |                                            |
| Participants              | 13*     | (a) Report numbers of individuals at each stage of study—eg numbers potentially eligible, examined for eligibility, confirmed eligible, included in the study, completing follow-up, and analysed | 5                                          |
|                           |         | (b) Give reasons for non-participation at each stage                                                                                                                                              | 5                                          |
|                           |         | (c) Consider use of a flow diagram                                                                                                                                                                |                                            |

|    |                          |     |                                                                                                                                                                                                              |                      |
|----|--------------------------|-----|--------------------------------------------------------------------------------------------------------------------------------------------------------------------------------------------------------------|----------------------|
| 1  | Descriptive data         | 14* | (a) Give characteristics of study participants (eg demographic, clinical, social) and information on exposures and potential confounders                                                                     | 8, Figure 1, Table 1 |
| 2  |                          |     | (b) Indicate number of participants with missing data for each variable of interest                                                                                                                          | 8, Table 1, Table 2  |
| 3  |                          |     | (c) Summarise follow-up time (eg, average and total amount)                                                                                                                                                  |                      |
| 4  | Outcome data             | 15* | Report numbers of outcome events or summary measures over time                                                                                                                                               | 8                    |
| 5  | Main results             | 16  | (a) Give unadjusted estimates and, if applicable, confounder-adjusted estimates and their precision (eg, 95% confidence interval). Make clear which confounders were adjusted for and why they were included | 9, Table 3           |
| 6  |                          |     | (b) Report category boundaries when continuous variables were categorized                                                                                                                                    | Table 1              |
| 7  |                          |     | (c) If relevant, consider translating estimates of relative risk into absolute risk for a meaningful time period                                                                                             |                      |
| 8  | Other analyses           | 17  | Report other analyses done—eg analyses of subgroups and interactions, and sensitivity analyses                                                                                                               | 9                    |
| 9  | <b>Discussion</b>        |     |                                                                                                                                                                                                              |                      |
| 10 | Key results              | 18  | Summarise key results with reference to study objectives                                                                                                                                                     | 10                   |
| 11 | Limitations              | 19  | Discuss limitations of the study, taking into account sources of potential bias or imprecision. Discuss both direction and magnitude of any potential bias                                                   | 10,11                |
| 12 | Interpretation           | 20  | Give a cautious overall interpretation of results considering objectives, limitations, multiplicity of analyses, results from similar studies, and other relevant evidence                                   | 10-13                |
| 13 | Generalisability         | 21  | Discuss the generalisability (external validity) of the study results                                                                                                                                        | 10,13                |
| 14 | <b>Other information</b> |     |                                                                                                                                                                                                              |                      |
| 15 | Funding                  | 22  | Give the source of funding and the role of the funders for the present study and, if applicable, for the original study on which the present article is based                                                | 14                   |

\*Give information separately for exposed and unexposed groups.

**Note:** An Explanation and Elaboration article discusses each checklist item and gives methodological background and published examples of transparent reporting. The STROBE checklist is best used in conjunction with this article (freely available on the Web sites of PLoS Medicine at <http://www.plosmedicine.org/>, Annals of Internal Medicine at <http://www.annals.org/>, and Epidemiology at <http://www.epidem.com/>). Information on the STROBE Initiative is available at <http://www.strobe-statement.org>.
